# Supplementary material for: Variation in quality of acute stroke care by day and time of admission: prospective cohort study of weekday and weekend centralised hyperacute stroke unit care and non-centralised services
Source: PubMed Central journal article supplement (PMC6858222; doi:10.1136/bmjopen-2018-025366), 2019-11-07
Supplement: bmjopen-2018-025366supp001.pdf [file bmjopen-2018-025366supp001.pdf]

## Supplementary Tables

**Supplementary Table 1. Quality of care and outcomes across four periods in the week unadjusted figures**

|                                                                           | London HASUs        |                     |                     |                     |                      | Rest of England     |                     |                     |                     |                      |
|---------------------------------------------------------------------------|---------------------|---------------------|---------------------|---------------------|----------------------|---------------------|---------------------|---------------------|---------------------|----------------------|
|                                                                           | Weekday             | Weekend             | Weekday             | Weekend             | p-value <sup>†</sup> | Weekday             | Weekend             | Weekday             | Weekend             | p-value <sup>†</sup> |
|                                                                           | 08:00-19:59         | 08:00-19:59         | 20:00-07:59         | 20:00-07:59         |                      | 08:00-19:59         | 08:00-19:59         | 20:00-07:59         | 20:00-07:59         |                      |
| Quality of care measures that do not vary across the week in London HASUs |                     |                     |                     |                     |                      |                     |                     |                     |                     |                      |
| Brain scan within one hour                                                | 0.58<br>(0.57-0.60) | 0.62<br>(0.59-0.64) | 0.61<br>(0.58-0.63) | 0.63<br>(0.59-0.67) | 0.0443               | 0.42<br>(0.41-0.43) | 0.41<br>(0.40-0.42) | 0.42<br>(0.41-0.43) | 0.43<br>(0.42-0.45) | 0.2145               |
| Brain scan within 12 hours                                                | 0.95<br>(0.95-0.96) | 0.96<br>(0.94-0.97) | 0.93<br>(0.91-0.94) | 0.92<br>(0.90-0.94) | 0.0000               | 0.88<br>(0.88-0.89) | 0.88<br>(0.87-0.88) | 0.84<br>(0.83-0.84) | 0.84<br>(0.83-0.85) | 0.0000               |
| Dysphagia screen within four hours                                        | 0.74<br>(0.72-0.75) | 0.76<br>(0.73-0.78) | 0.77<br>(0.74-0.79) | 0.78<br>(0.74-0.81) | 0.0359               | 0.69<br>(0.69-0.70) | 0.66<br>(0.65-0.66) | 0.61<br>(0.60-0.62) | 0.60<br>(0.58-0.62) | 0.0000               |
| Assessment by a nurse trained in stroke management within 24 hours        | 0.96<br>(0.95-0.96) | 0.95<br>(0.94-0.96) | 0.95<br>(0.93-0.96) | 0.95<br>(0.94-0.97) | 0.4109               | 0.88<br>(0.88-0.89) | 0.86<br>(0.85-0.86) | 0.86<br>(0.85-0.86) | 0.84<br>(0.82-0.85) | 0.0000               |
| Administration of intravenous thrombolysis to eligible patients           | 0.88<br>(0.85-0.90) | 0.87<br>(0.83-0.92) | 0.87<br>(0.83-0.91) | 0.88<br>(0.81-0.95) | 0.9905               | 0.80<br>(0.79-0.81) | 0.79<br>(0.77-0.81) | 0.74<br>(0.72-0.77) | 0.75<br>(0.72-0.79) | 0.0000               |
| Door-to-needle time within one hour in patients receiving thrombolysis    | 0.84<br>(0.81-0.87) | 0.88<br>(0.84-0.93) | 0.79<br>(0.74-0.85) | 0.85<br>(0.78-0.92) | 0.0677               | 0.60<br>(0.59-0.62) | 0.48<br>(0.45-0.51) | 0.38<br>(0.35-0.41) | 0.36<br>(0.32-0.41) | 0.0000               |
| Quality of care: measures that vary significantly across the week         |                     |                     |                     |                     |                      |                     |                     |                     |                     |                      |
| Assessment by a stroke specialist consultant physician within 12 hours    | 0.39<br>(0.37-0.40) | 0.30<br>(0.28-0.33) | 0.63<br>(0.60-0.65) | 0.65<br>(0.61-0.69) | 0.0000               | 0.47<br>(0.47-0.48) | 0.30<br>(0.30-0.31) | 0.52<br>(0.51-0.53) | 0.44<br>(0.42-0.45) | 0.0000               |
| Assessment by a stroke specialist consultant physician within 24 hours    | 0.90<br>(0.89-0.91) | 0.87<br>(0.86-0.89) | 0.90<br>(0.88-0.91) | 0.92<br>(0.90-0.94) | 0.0173               | 0.79<br>(0.79-0.80) | 0.66<br>(0.65-0.67) | 0.74<br>(0.73-0.75) | 0.63<br>(0.62-0.65) | 0.0000               |
| Admission to a stroke unit within four hours                              | 0.62<br>(0.60-0.63) | 0.65<br>(0.62-0.67) | 0.68<br>(0.66-0.70) | 0.71<br>(0.67-0.74) | 0.0000               | 0.62<br>(0.62-0.63) | 0.60<br>(0.59-0.61) | 0.55<br>(0.54-0.56) | 0.55<br>(0.53-0.57) | 0.0000               |
| Physiotherapist assessment within 72 hours                                | 0.83<br>(0.82-0.84) | 0.86<br>(0.84-0.88) | 0.85<br>(0.83-0.87) | 0.84<br>(0.81-0.87) | 0.0538               | 0.82<br>(0.82-0.82) | 0.83<br>(0.82-0.84) | 0.80<br>(0.79-0.81) | 0.81<br>(0.79-0.82) | 0.0000               |
| Occupational Therapist assessment within 72 hours                         | 0.79<br>(0.77-0.80) | 0.82<br>(0.79-0.84) | 0.81 (0.79-0.83)    | 0.80<br>(0.77-0.84) | 0.0993               | 0.74<br>(0.73-0.74) | 0.75<br>(0.74-0.76) | 0.71<br>(0.70-0.72) | 0.72<br>(0.71-0.74) | 0.0000               |
| Swallow assessment by a SLT within 72 hours                               | 0.92<br>(0.90-0.93) | 0.94<br>(0.92-0.96) | 0.93 (0.91-0.95)    | 0.93<br>(0.89-0.96) | 0.3473               | 0.80<br>(0.79-0.80) | 0.81<br>(0.80-0.82) | 0.79<br>(0.78-0.81) | 0.80<br>(0.79-0.82) | 0.1258               |
| Communication assessment by a SLT within 72 hours                         | 0.53<br>(0.51-0.55) | 0.57<br>(0.55-0.60) | 0.54<br>(0.52-0.57) | 0.50<br>(0.46-0.55) | 0.0191               | 0.32<br>(0.32-0.33) | 0.36<br>(0.35-0.37) | 0.34<br>(0.33-0.35) | 0.34<br>(0.32-0.35) | 0.0000               |

|                                                   |                     |                     |                     |                     |        |                     |                     |                     |                     |        |
|---------------------------------------------------|---------------------|---------------------|---------------------|---------------------|--------|---------------------|---------------------|---------------------|---------------------|--------|
| Physiotherapist assessment within 24 hours        | 0.56<br>(0.55-0.58) | 0.47<br>(0.44-0.50) | 0.65<br>(0.63-0.68) | 0.49<br>(0.45-0.53) | 0.0000 | 0.54<br>(0.54-0.55) | 0.40<br>(0.40-0.41) | 0.52<br>(0.51-0.53) | 0.35<br>(0.33-0.36) | 0.0000 |
| Occupational Therapist assessment within 24 hours | 0.49<br>(0.47-0.50) | 0.42<br>(0.39-0.45) | 0.58<br>(0.56-0.61) | 0.43<br>(0.39-0.47) | 0.0000 | 0.43<br>(0.42-0.43) | 0.30<br>(0.30-0.31) | 0.41<br>(0.40-0.42) | 0.26<br>(0.25-0.27) | 0.0000 |
| Communication assessment by a SLT within 24 hours | 0.29<br>(0.28-0.31) | 0.23<br>(0.20-0.25) | 0.39 (0.36-0.41)    | 0.22<br>(0.19-0.25) | 0.0000 | 0.17<br>(0.17-0.17) | 0.10<br>(0.09-0.10) | 0.19<br>(0.18-0.20) | 0.08<br>(0.07-0.09) | 0.0000 |
| Outcome measures                                  |                     |                     |                     |                     |        |                     |                     |                     |                     |        |
| Mortality at three days                           | 0.02<br>(0.02-0.03) | 0.04<br>(0.03-0.05) | 0.03<br>(0.02-0.03) | 0.02<br>(0.01-0.03) | 0.0547 | 0.04<br>(0.04-0.04) | 0.04<br>(0.04-0.04) | 0.06<br>(0.05-0.06) | 0.06<br>(0.05-0.06) | 0.0000 |
| mRS score 3-6                                     | 0.55<br>(0.53-0.56) | 0.58<br>(0.55-0.60) | 0.52<br>(0.50-0.55) | 0.54<br>(0.50-0.58) | 0.0553 | 0.46<br>(0.46-0.47) | 0.50<br>(0.49-0.51) | 0.54<br>(0.53-0.55) | 0.54<br>(0.53-0.56) | 0.0000 |
| mRS score 3-5*                                    | 0.48<br>(0.46-0.49) | 0.51<br>(0.48-0.54) | 0.46<br>(0.43-0.49) | 0.47<br>(0.43-0.52) | 0.1024 | 0.38<br>(0.37-0.38) | 0.41<br>(0.40-0.42) | 0.44<br>(0.43-0.45) | 0.44<br>(0.42-0.46) | 0.0000 |
| Length of stay                                    |                     |                     |                     |                     |        |                     |                     |                     |                     |        |
| Length of stay in HASU (days)                     | 3.0 (2.9-3.1)       | 3.3 (3.2-3.5)       | 2.9 (2.7-3.0)       | 3.0 (2.8-3.2)       | 0.0000 |                     |                     |                     |                     |        |
| Length of stay in hospital (days)                 | 7.8 (7.4-8.1)       | 9.2 (8.5-10.0)      | 7.6 (7.0-8.2)       | 8.0 (7.0-9.0)       | 0.0016 | 6.6 (6.5-6.6)       | 7.5 (7.3-7.7)       | 8.4 (8.2-8.6)       | 8.7 (8.3-9.1)       | 0.0000 |

Note.

Figures are average predicted probabilities (95% confidence intervals) of each measure in each time period controlling for the covariates. SLT = Speech and Language Therapist. mRS = modified Rankin Scale. \* Patients who died were not included. †P-value threshold adjusted for multiple testing is 0.0025 for London HASUs and 0.0024 for the rest of England.

**Supplementary Table 2A. Quality of care and outcomes across four periods in the week (p-values comparison between Wald test and Likelihood-ratio test)**

|                                                                           | London HASUs     |                  |                  |                  |                      |                       | Rest of England  |                  |                  |                  |                      |                       |
|---------------------------------------------------------------------------|------------------|------------------|------------------|------------------|----------------------|-----------------------|------------------|------------------|------------------|------------------|----------------------|-----------------------|
|                                                                           | Weekday          | Weekend          | Weekday          | Weekend          | p-value <sup>†</sup> | p-value <sup>†</sup>  | Weekday          | Weekend          | Weekday          | Weekend          | p-value <sup>†</sup> | p-value <sup>†</sup>  |
|                                                                           | 08:00-19:59      | 08:00-19:59      | 20:00-07:59      | 20:00-07:59      | Wald                 | Likelihood-ratio test | 08:00-19:59      | 08:00-19:59      | 20:00-07:59      | 20:00-07:59      | Wald                 | Likelihood-ratio test |
| Quality of care measures that do not vary across the week in London HASUs |                  |                  |                  |                  |                      |                       |                  |                  |                  |                  |                      |                       |
| Brain scan within one hour                                                | 0.60 (0.58-0.61) | 0.61 (0.58-0.63) | 0.63 (0.60-0.65) | 0.65 (0.61-0.68) | 0.0344               | 0.0336                | 0.44 (0.44-0.45) | 0.41 (0.40-0.41) | 0.40 (0.39-0.40) | 0.39 (0.38-0.41) | 0.0000               | 0.0000                |
| Brain scan within 12 hours                                                | 0.97 (0.96-0.97) | 0.96 (0.95-0.97) | 0.95 (0.94-0.96) | 0.95 (0.93-0.96) | 0.0093               | 0.0110                | 0.90 (0.90-0.90) | 0.88 (0.87-0.89) | 0.84 (0.83-0.84) | 0.83 (0.82-0.84) | 0.0000               | 0.0000                |
| Dysphagia screen within four hours                                        | 0.74 (0.72-0.75) | 0.75 (0.73-0.77) | 0.77 (0.75-0.79) | 0.79 (0.76-0.82) | 0.0029               | 0.0026                | 0.70 (0.70-0.71) | 0.65 (0.64-0.66) | 0.60 (0.59-0.61) | 0.58 (0.56-0.59) | 0.0000               | 0.0000                |
| Assessment by a nurse trained in stroke management within 24 hours        | 0.96 (0.95-0.96) | 0.94 (0.93-0.96) | 0.95 (0.94-0.96) | 0.95 (0.94-0.97) | 0.1872               | 0.1896                | 0.89 (0.88-0.89) | 0.85 (0.85-0.86) | 0.86 (0.86-0.87) | 0.83 (0.82-0.84) | 0.0000               | 0.0000                |
| Administration of intravenous thrombolysis to eligible patients           | 0.88 (0.86-0.90) | 0.88 (0.84-0.92) | 0.86 (0.82-0.91) | 0.88 (0.82-0.95) | 0.9327               | 0.9341                | 0.81 (0.80-0.82) | 0.80 (0.78-0.82) | 0.76 (0.74-0.78) | 0.76 (0.72-0.79) | 0.0000               | 0.0000                |
| Door-to-needle time within one hour in patients receiving thrombolysis    | 0.84 (0.81-0.87) | 0.89 (0.85-0.93) | 0.79 (0.74-0.84) | 0.84 (0.77-0.91) | 0.0269               | 0.0233                | 0.60 (0.59-0.62) | 0.48 (0.45-0.50) | 0.38 (0.35-0.40) | 0.37 (0.33-0.41) | 0.0000               | 0.0000                |
| Quality of care: measures that vary significantly across the week         |                  |                  |                  |                  |                      |                       |                  |                  |                  |                  |                      |                       |
| Assessment by a stroke specialist consultant physician                    | 0.39 (0.38-.40)  | 0.30 (0.27-0.32) | 0.63 (0.61-0.66) | 0.64 (0.60-0.68) | 0.0000               | 0.0000                | 0.48 (0.48-0.49) | 0.30 (0.29-0.31) | 0.51 (0.51-0.52) | 0.42 (0.41-0.44) | 0.0000               | 0.0000                |

|                                                                        |                  |                  |                  |                  |        |        |                  |                  |                  |                  |        |        |
|------------------------------------------------------------------------|------------------|------------------|------------------|------------------|--------|--------|------------------|------------------|------------------|------------------|--------|--------|
| within 12 hours                                                        |                  |                  |                  |                  |        |        |                  |                  |                  |                  |        |        |
| Assessment by a stroke specialist consultant physician within 24 hours | 0.90 (0.89-0.91) | 0.87 (0.85-0.89) | 0.90 (0.88-0.91) | 0.92 (0.90-0.94) | 0.0043 | 0.0048 | 0.80 (0.79-0.80) | 0.65 (0.65-0.66) | 0.75 (0.74-0.75) | 0.62 (0.61-0.64) | 0.0000 | 0.0000 |
| Admission to a stroke unit within four hours                           | 0.62 (0.60-0.63) | 0.64 (0.61-0.66) | 0.67 (0.65-0.70) | 0.70 (0.67-0.74) | 0.0000 | 0.0000 | 0.63 (0.63-0.63) | 0.59 (0.58-0.60) | 0.55 (0.54-0.56) | 0.53 (0.52-0.55) | 0.0000 | 0.0000 |
| Physiotherapist assessment within 72 hours                             | 0.83 (0.82-0.84) | 0.86 (0.84-0.88) | 0.85 (0.83-0.87) | 0.84 (0.81-0.87) | 0.0693 | 0.0666 | 0.82 (0.81-0.82) | 0.83 (0.82-0.84) | 0.81 (0.81-0.82) | 0.82 (0.80-0.83) | 0.0010 | 0.0009 |
| Occupational Therapist assessment within 72 hours                      | 0.79 (0.78-0.80) | 0.82 (0.80-0.84) | 0.81 (0.79-0.82) | 0.80 (0.76-0.83) | 0.0967 | 0.0936 | 0.73 (0.73-0.74) | 0.75 (0.75-0.76) | 0.73 (0.72-0.74) | 0.73 (0.72-0.74) | 0.0000 | 0.0000 |
| Swallow assessment by a SLT within 72 hours                            | 0.92 (0.91-0.93) | 0.93 (0.91-0.95) | 0.93 (0.91-0.95) | 0.91 (0.88-0.95) | 0.5838 | 0.5795 | 0.80 (0.80-0.81) | 0.81 (0.80-0.82) | 0.79 (0.78-0.80) | 0.80 (0.78-0.82) | 0.0946 | 0.0946 |
| Communication assessment by a SLT within 72 hours                      | 0.53 (0.51-0.54) | 0.56 (0.54-0.59) | 0.55 (0.53-0.58) | 0.52 (0.48-0.56) | 0.0739 | 0.0735 | 0.33 (0.32-0.33) | 0.36 (0.35-0.37) | 0.34 (0.33-0.35) | 0.34 (0.32-0.35) | 0.0000 | 0.0000 |
| Physiotherapist assessment within 24 hours                             | 0.56 (0.54-0.57) | 0.47 (0.45-0.50) | 0.65 (0.63-0.68) | 0.48 (0.44-0.52) | 0.0000 | 0.0000 | 0.54 (0.54-0.55) | 0.41 (0.40-0.41) | 0.53 (0.52-0.54) | 0.35 (0.34-0.37) | 0.0000 | 0.0000 |
| Occupational Therapist assessment within 24 hours                      | 0.49 (0.47-0.50) | 0.42 (0.40-0.45) | 0.58 (0.55-0.60) | 0.41 (0.37-0.45) | 0.0000 | 0.0000 | 0.43 (0.42-0.43) | 0.31 (0.30-0.31) | 0.42 (0.42-0.43) | 0.26 (0.25-0.27) | 0.0000 | 0.0000 |
| Communication assessment by a SLT within 24 hours                      | 0.29 (0.28-0.31) | 0.22 (0.20-0.24) | 0.39 (0.37-0.42) | 0.23 (0.20-0.27) | 0.0000 | 0.0000 | 0.17 (0.17-0.17) | 0.10 (0.09-0.10) | 0.19 (0.18-0.20) | 0.08 (0.07-0.09) | 0.0000 | 0.0000 |
| Outcome measures                                                       |                  |                  |                  |                  |        |        |                  |                  |                  |                  |        |        |
| Mortality at three days                                                | 0.03 (0.02-0.03) | 0.03 (0.02-0.04) | 0.03 (0.02-0.04) | 0.02 (0.01-0.03) | 0.3310 | 0.3298 | 0.04 (0.04-0.05) | 0.04 (0.04-0.04) | 0.05 (0.04-0.05) | 0.05 (0.04-0.05) | 0.1055 | 0.1030 |
| mRS score 3-6                                                          | 0.55 (0.53-      | 0.55 (0.52-      | 0.55 (0.52-      | 0.56 (0.53-      | 0.8672 | 0.8673 | 0.48 (0.48-      | 0.49 (0.48-      | 0.51 (0.50-      | 0.51 (0.50-      | 0.0000 | 0.0000 |

|                                   |                  |                  |                  |                  |        |        |                  |                  |                  |                  |        |        |
|-----------------------------------|------------------|------------------|------------------|------------------|--------|--------|------------------|------------------|------------------|------------------|--------|--------|
|                                   | 0.56)            | 0.57)            | 0.57)            | 0.59)            |        |        | 0.48)            | 0.50)            | 0.51)            | 0.52)            |        |        |
| mRS score 3-5*                    | 0.49 (0.47-0.50) | 0.47 (0.45-0.50) | 0.48 (0.45-0.50) | 0.48 (0.44-0.51) | 0.7497 | 0.7494 | 0.40 (0.39-0.40) | 0.40 (0.39-0.41) | 0.40 (0.39-0.41) | 0.40 (0.39-0.41) | 0.3746 | 0.3750 |
| Length of stay                    |                  |                  |                  |                  |        |        |                  |                  |                  |                  |        |        |
| Length of stay in HASU (days)     | 3.1 (3.0-3.2)    | 3.4 (3.2-3.5)    | 3.0 (2.9-3.1)    | 3.1 (2.9-3.3.)   | 0.0007 | 0.0008 |                  |                  |                  |                  |        |        |
| Length of stay in hospital (days) | 10.8 (10.2-11.3) | 12.1 (11.1-13.1) | 10.8 (10.0-11.7) | 11.5 (10.2-12.9) | 0.0359 | 0.0359 | 8.5 (8.4-8.6)    | 9.2 (9.0-9.4)    | 9.7(9.4-9.9)     | 10.1 (9.6-10.5)  | 0.0000 | 0.0000 |

Note.

Figures are average predicted probabilities (95% confidence intervals) of each measure in each time period controlling for the covariates. SLT = Speech and Language Therapist. mRS = modified Rankin Scale. \* Patients who died were not included. †P-value threshold adjusted for multiple testing is 0.0025 for London HASUs and 0.0024 for the rest of England.

**Supplementary Table 3. Quality of care and outcomes across four periods in the week cotrolling for NIHSS score on arrival**

|                                                                           | London HASUs        |                     |                     |                     |          | Rest of England     |                     |                     |                     |          |
|---------------------------------------------------------------------------|---------------------|---------------------|---------------------|---------------------|----------|---------------------|---------------------|---------------------|---------------------|----------|
|                                                                           | Weekday             | Weekend             | Weekday             | Weekend             | †p-value | Weekday             | Weekend             | Weekday             | Weekend             | †p-value |
|                                                                           | 08:00-19:59         | 08:00-19:59         | 20:00-07:59         | 20:00-07:59         |          | 08:00-19:59         | 08:00-19:59         | 20:00-07:59         | 20:00-07:59         |          |
| Quality of care measures that do not vary across the week in London HASUs |                     |                     |                     |                     |          |                     |                     |                     |                     |          |
| Brain scan within one hour                                                | 0.60<br>(0.59-0.62) | 0.61<br>(0.59-0.64) | 0.63<br>(0.61-0.66) | 0.65<br>(0.62-0.69) | 0.0256   | 0.47<br>(0.46-0.47) | 0.43<br>(0.42-0.44) | 0.41<br>(0.41-0.42) | 0.41<br>(0.40-0.43) | 0.0000   |
| Brain scan within 12 hours                                                | 0.97<br>(0.97-0.98) | 0.97<br>(0.96-0.98) | 0.95<br>(0.94-0.96) | 0.94<br>(0.92-0.96) | 0.0012   | 0.91<br>(0.91-0.92) | 0.89<br>(0.89-0.90) | 0.85<br>(0.84-0.86) | 0.85<br>(0.84-0.86) | 0.0000   |
| Dysphagia screen within four hours                                        | 0.74<br>(0.73-0.76) | 0.76<br>(0.74-0.79) | 0.78<br>(0.76-0.81) | 0.80<br>(0.77-0.84) | 0.0003   | 0.74<br>(0.73-0.74) | 0.68<br>(0.68-0.69) | 0.64<br>(0.63-0.65) | 0.61<br>(0.60-0.63) | 0.0000   |
| Assessment by a nurse trained in stroke management within 24 hours        | 0.96<br>(0.96-0.97) | 0.95<br>(0.94-0.96) | 0.95<br>(0.94-0.96) | 0.96<br>(0.95-0.98) | 0.1191   | 0.92<br>(0.92-0.93) | 0.89<br>(0.89-0.90) | 0.90<br>(0.90-0.91) | 0.88<br>(0.87-0.89) | 0.0000   |
| Administration of intravenous thrombolysis to eligible patients           | 0.89<br>(0.86-0.91) | 0.89<br>(0.85-0.93) | 0.88<br>(0.83-0.92) | 0.87<br>(0.81-0.94) | 0.9436   | 0.83<br>(0.82-0.84) | 0.83<br>(0.81-0.84) | 0.78<br>(0.76-0.80) | 0.79<br>(0.75-0.82) | 0.0000   |
| Door-to-needle time within one hour in patients receiving thrombolysis    | 0.84<br>(0.81-0.87) | 0.89<br>(0.85-0.93) | 0.79<br>(0.74-0.85) | 0.85<br>(0.78-0.92) | 0.0673   | 0.62<br>(0.60-0.63) | 0.48<br>(0.46-0.51) | 0.39<br>(0.36-0.42) | 0.38<br>(0.33-0.42) | 0.0000   |
| Quality of care: measures that vary significantly across the week         |                     |                     |                     |                     |          |                     |                     |                     |                     |          |
| Assessment by a stroke specialist consultant physician within 12 hours    | 0.39<br>(0.38-.40)  | 0.29<br>(0.27-0.31) | 0.64<br>(0.62-0.67) | 0.65<br>(0.62-0.69) | 0.0000   | 0.52<br>(0.52-0.53) | 0.33<br>(0.32-0.34) | 0.55<br>(0.54-0.56) | 0.46<br>(0.44-0.47) | 0.0000   |
| Assessment by a stroke specialist consultant physician within 24 hours    | 0.90<br>(0.89-0.91) | 0.88<br>(0.86-0.89) | 0.90<br>(0.89-0.92) | 0.94<br>(0.92-0.96) | 0.0005   | 0.84<br>(0.83-0.84) | 0.70<br>(0.69-0.71) | 0.79<br>(0.78-0.80) | 0.67<br>(0.65-0.68) | 0.0000   |
| Admission to a stroke unit within four hours                              | 0.62<br>(0.61-0.64) | 0.65<br>(0.62-0.68) | 0.69<br>(0.66-0.71) | 0.71<br>(0.67-0.74) | 0.0000   | 0.67<br>(0.67-0.68) | 0.63<br>(0.62-0.64) | 0.59<br>(0.58-0.60) | 0.57<br>(0.56-0.59) | 0.0000   |
| Physiotherapist assessment within 72 hours                                | 0.84<br>(0.83-0.85) | 0.87<br>(0.85-0.89) | 0.86<br>(0.84-0.88) | 0.85<br>(0.82-0.88) | 0.1845   | 0.85<br>(0.85-0.85) | 0.86<br>(0.86-0.87) | 0.85<br>(0.84-0.85) | 0.85<br>(0.84-0.86) | 0.0022   |
| Occupational Therapist assessment within 72 hours                         | 0.80<br>(0.79-0.81) | 0.83<br>(0.81-0.85) | 0.82<br>(0.80-0.84) | 0.81<br>(0.78-0.84) | 0.0707   | 0.77<br>(0.77-0.77) | 0.79<br>(0.78-0.80) | 0.77<br>(0.76-0.78) | 0.77<br>(0.76-0.78) | 0.0005   |
| Swallow assessment by a SLT within 72 hours                               | 0.93<br>(0.91-0.94) | 0.95<br>(0.93-0.97) | 0.94<br>(0.92-0.96) | 0.91<br>(0.87-0.85) | 0.2298   | 0.83<br>(0.82-0.83) | 0.84<br>(0.83-0.85) | 0.82<br>(0.81-0.83) | 0.82<br>(0.80-0.84) | 0.1677   |

|                                                   |                     |                     |                     |                      |        |                     |                     |                     |                     |        |
|---------------------------------------------------|---------------------|---------------------|---------------------|----------------------|--------|---------------------|---------------------|---------------------|---------------------|--------|
| Communication assessment by a SLT within 72 hours | 0.54<br>(0.52-0.55) | 0.57<br>(0.54-0.60) | 0.56<br>(0.54-0.59) | 0.53<br>(0.49-0.57)  | 0.1069 | 0.33 (0.32-0.33)    | 0.36 (0.35-0.37)    | 0.33 (0.32-0.34)    | 0.34 (0.32-0.36)    | 0.0000 |
| Physiotherapist assessment within 24 hours        | 0.57<br>(0.55-0.58) | 0.49<br>(0.46-0.51) | 0.66<br>(0.64-0.69) | 0.49<br>(0.45-0.53)  | 0.0000 | 0.57<br>(0.57-0.58) | 0.43<br>(0.42-0.44) | 0.57<br>(0.56-0.58) | 0.38<br>(0.36-0.39) | 0.0000 |
| Occupational Therapist assessment within 24 hours | 0.49<br>(0.48-0.51) | 0.43<br>(0.41-0.46) | 0.59<br>(0.56-0.61) | 0.42<br>(0.38-0.46)  | 0.0000 | 0.45<br>(0.45-0.46) | 0.33<br>(0.32-0.33) | 0.46<br>(0.45-0.47) | 0.28<br>(0.27-0.30) | 0.0000 |
| Communication assessment by a SLT within 24 hours | 0.30<br>(0.28-0.31) | 0.22<br>(0.20-0.25) | 0.40<br>(0.38-0.43) | 0.24<br>(0.20-0.27)  | 0.0000 | 0.17<br>(0.17-0.18) | 0.10<br>(0.09-0.10) | 0.19<br>(0.18-0.20) | 0.08<br>(0.07-0.09) | 0.0000 |
| Outcome measures                                  |                     |                     |                     |                      |        |                     |                     |                     |                     |        |
| Mortality at three days                           | 0.02<br>(0.02-0.03) | 0.03<br>(0.02-0.04) | 0.03<br>(0.02-0.04) | 0.02<br>(0.01-0.03)  | 0.2987 | 0.03<br>(0.03-0.03) | 0.03<br>(0.02-0.03) | 0.03<br>(0.03-0.03) | 0.03<br>(0.02-0.03) | 0.6904 |
| mRS score 3-6                                     | 0.53<br>(0.52-0.54) | 0.52<br>(0.50-0.55) | 0.53<br>(0.51-0.55) | 0.54<br>(0.510-0.57) | 0.8754 | 0.43<br>(0.43-0.44) | 0.44<br>(0.43-0.45) | 0.45<br>(0.44-0.46) | 0.46<br>(0.44-0.47) | 0.0000 |
| mRS score 3-5*                                    | 0.49<br>(0.47-0.50) | 0.47<br>(0.45-0.50) | 0.48<br>(0.45-0.50) | 0.48<br>(0.44-0.51)  | 0.7497 | 0.40<br>(0.39-0.40) | 0.40<br>(0.39-0.41) | 0.40<br>(0.39-0.41) | 0.40<br>(0.39-0.41) | 0.3746 |
| Length of stay                                    |                     |                     |                     |                      |        |                     |                     |                     |                     |        |
| Length of stay in HASU (days)                     | 3.1<br>(3.0-3.2)    | 3.3<br>(3.2-3.5)    | 3.0<br>(2.9-3.1)    | 3.1<br>(2.9-3.3)     | 0.0080 |                     |                     |                     |                     |        |
| Length of stay in hospital (days)                 | 12.8<br>(12.1-13.6) | 14.4<br>(13.2-15.6) | 13.2 (12.2-14.3)    | 13.2<br>(11.7-14.7)  | 0.0562 | 8.9<br>(8.7-9.0)    | 9.5<br>(9.3-9.8)    | 9.9<br>(9.6-10.2)   | 10.4<br>(10.0-10.9) | 0.0000 |

Note.

Figures are average predicted probabilities (95% confidence intervals) of each measure in each time period controlling for the covariates. SLT = Speech and Language Therapist. mRS = modified Rankin Scale. \* Patients who died were not included. †P-value threshold adjusted for multiple testing is 0.0025 for London HASUs and 0.0024 for the rest of England.

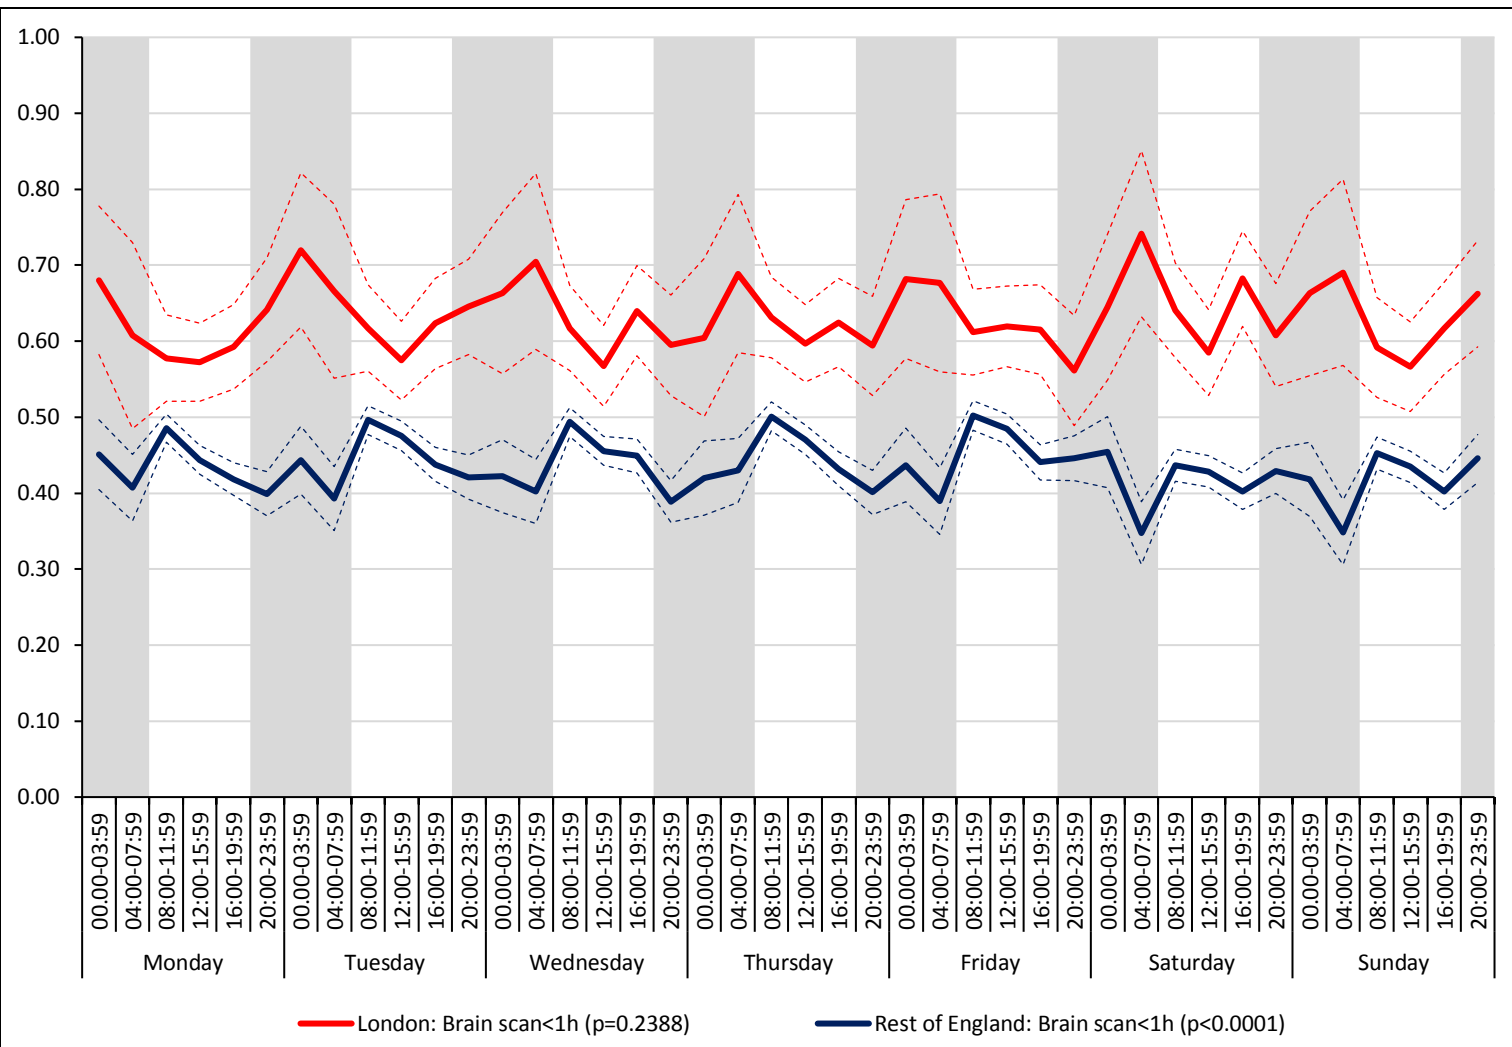

Figure S1(a). Brain scan within one hour

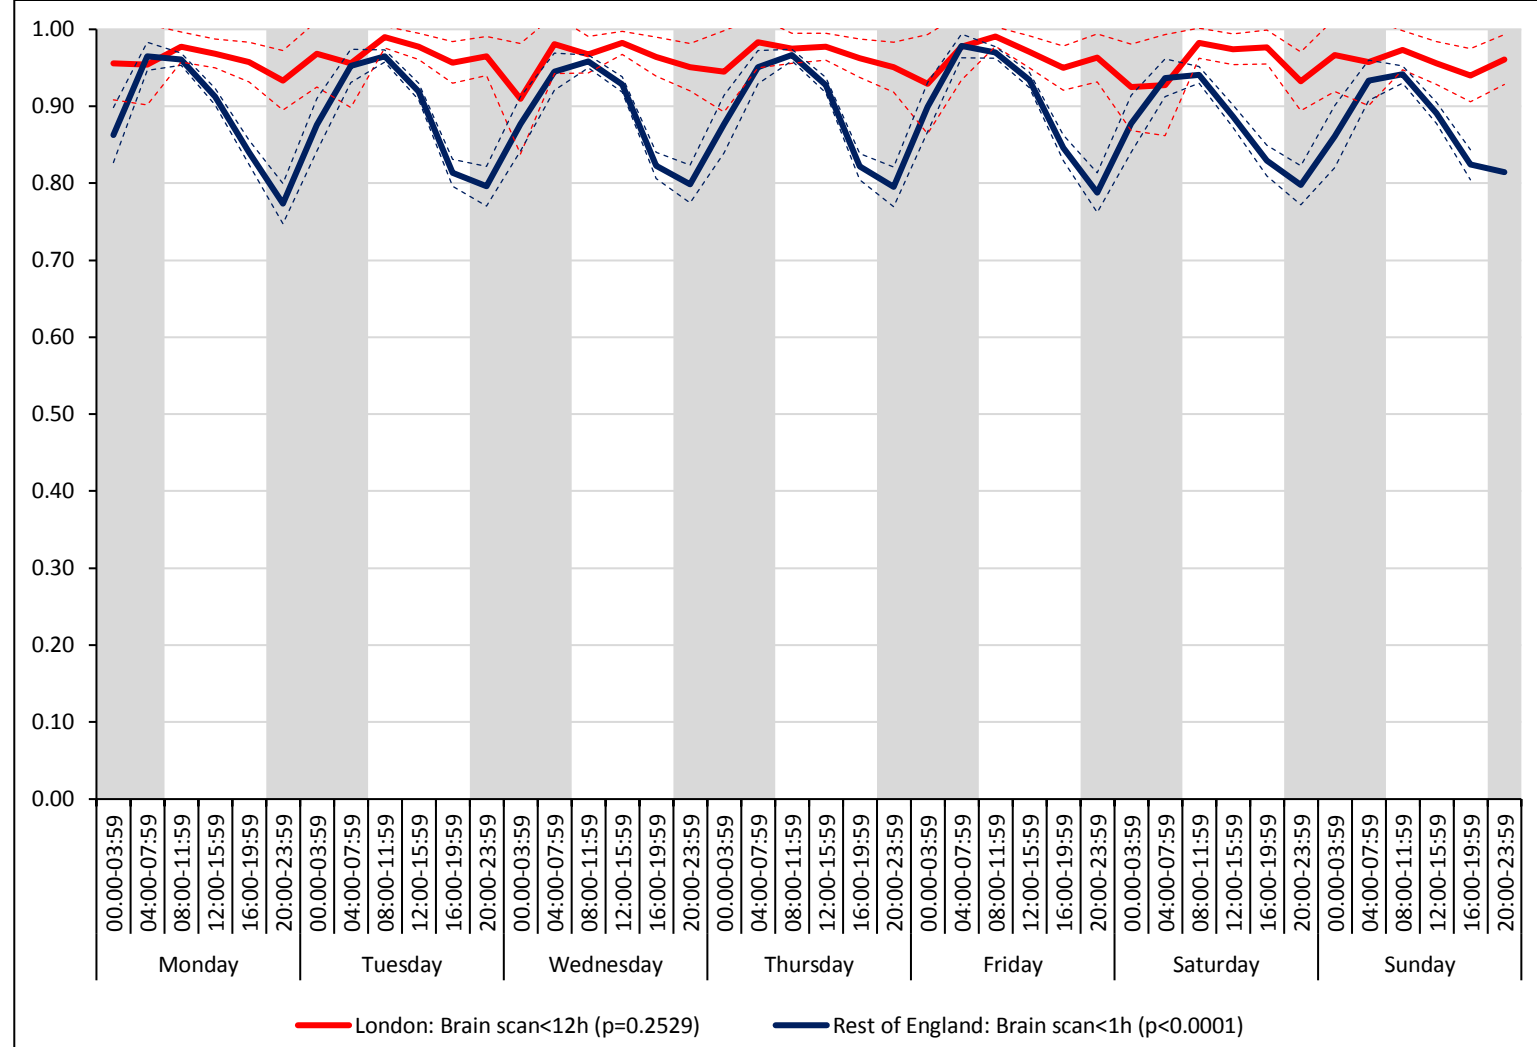

Figure S1(b). Brain scan within 12 hours

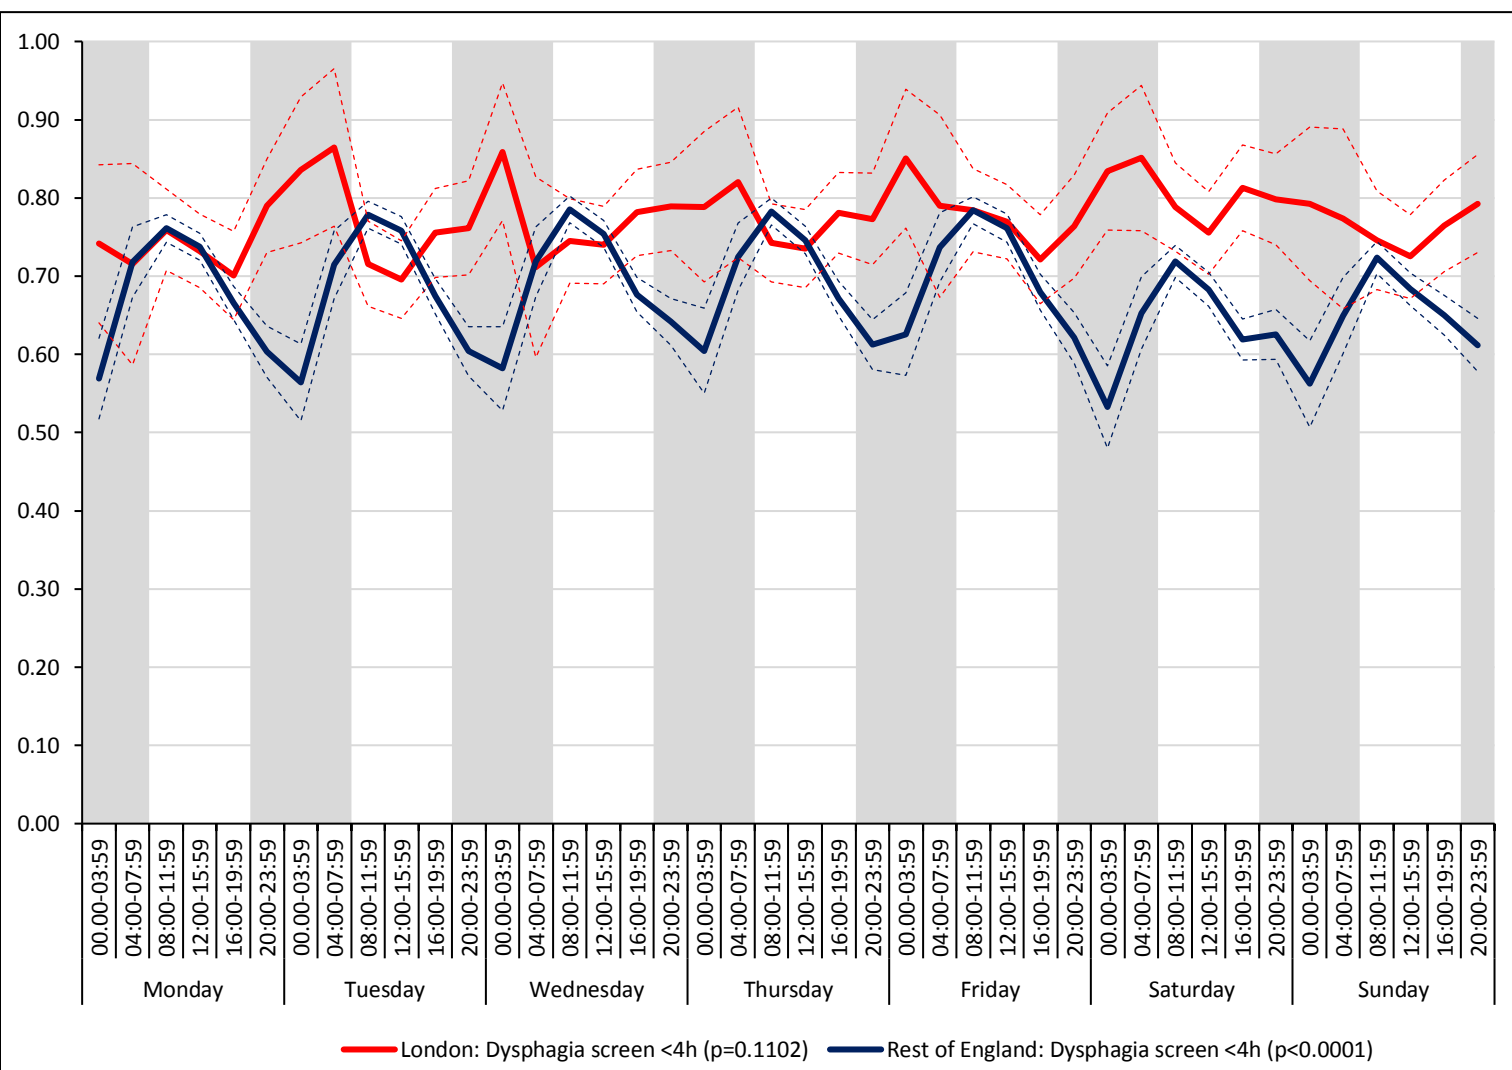

Figure S1(c). Dysphagia screen within four hours

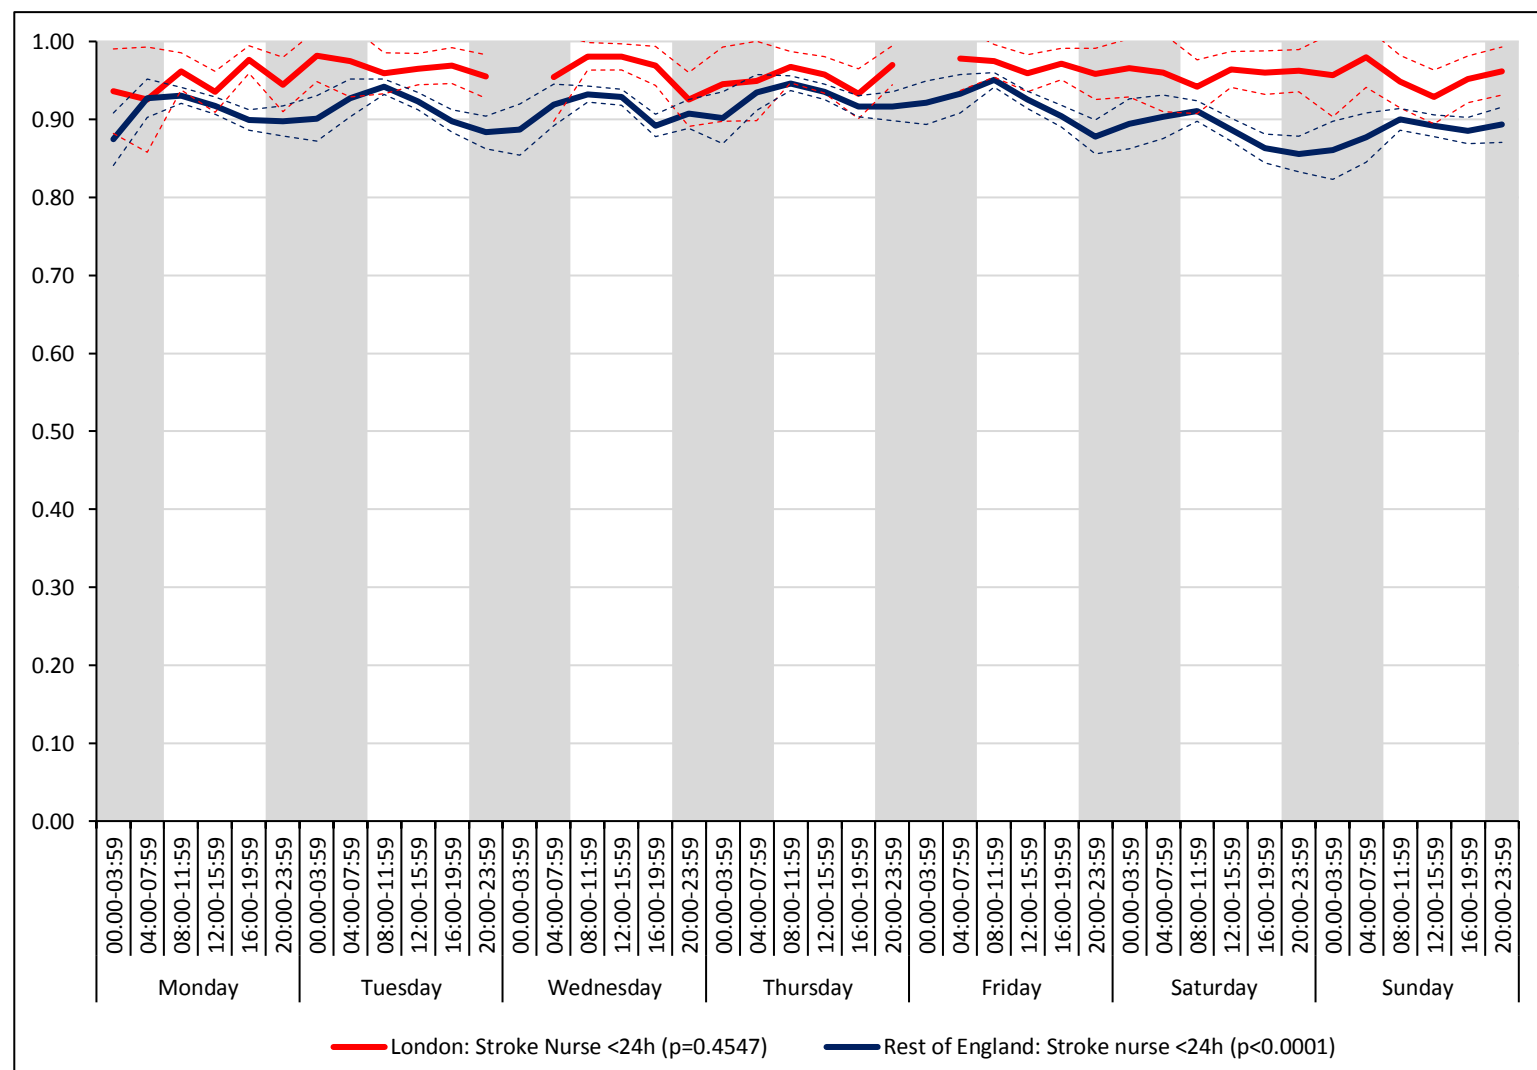

Figure S1(d). Nurse assessment within 24 hours

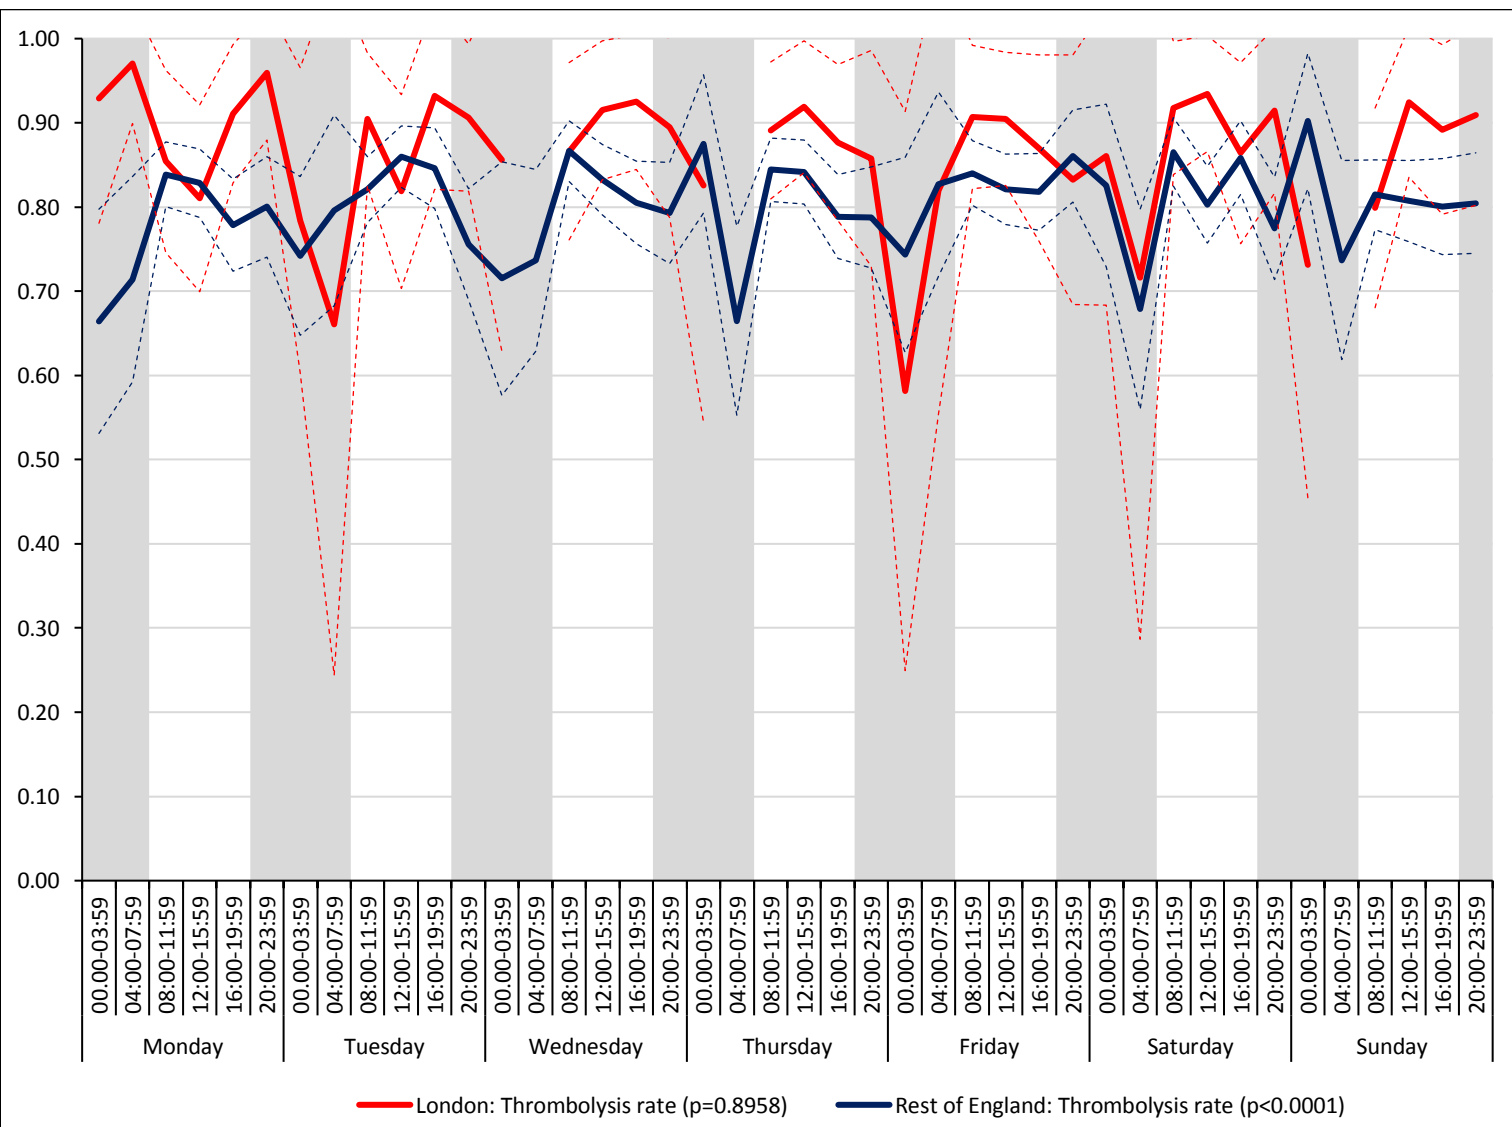

Figure S1(e). Administration of intravenous thrombolysis to eligible patients

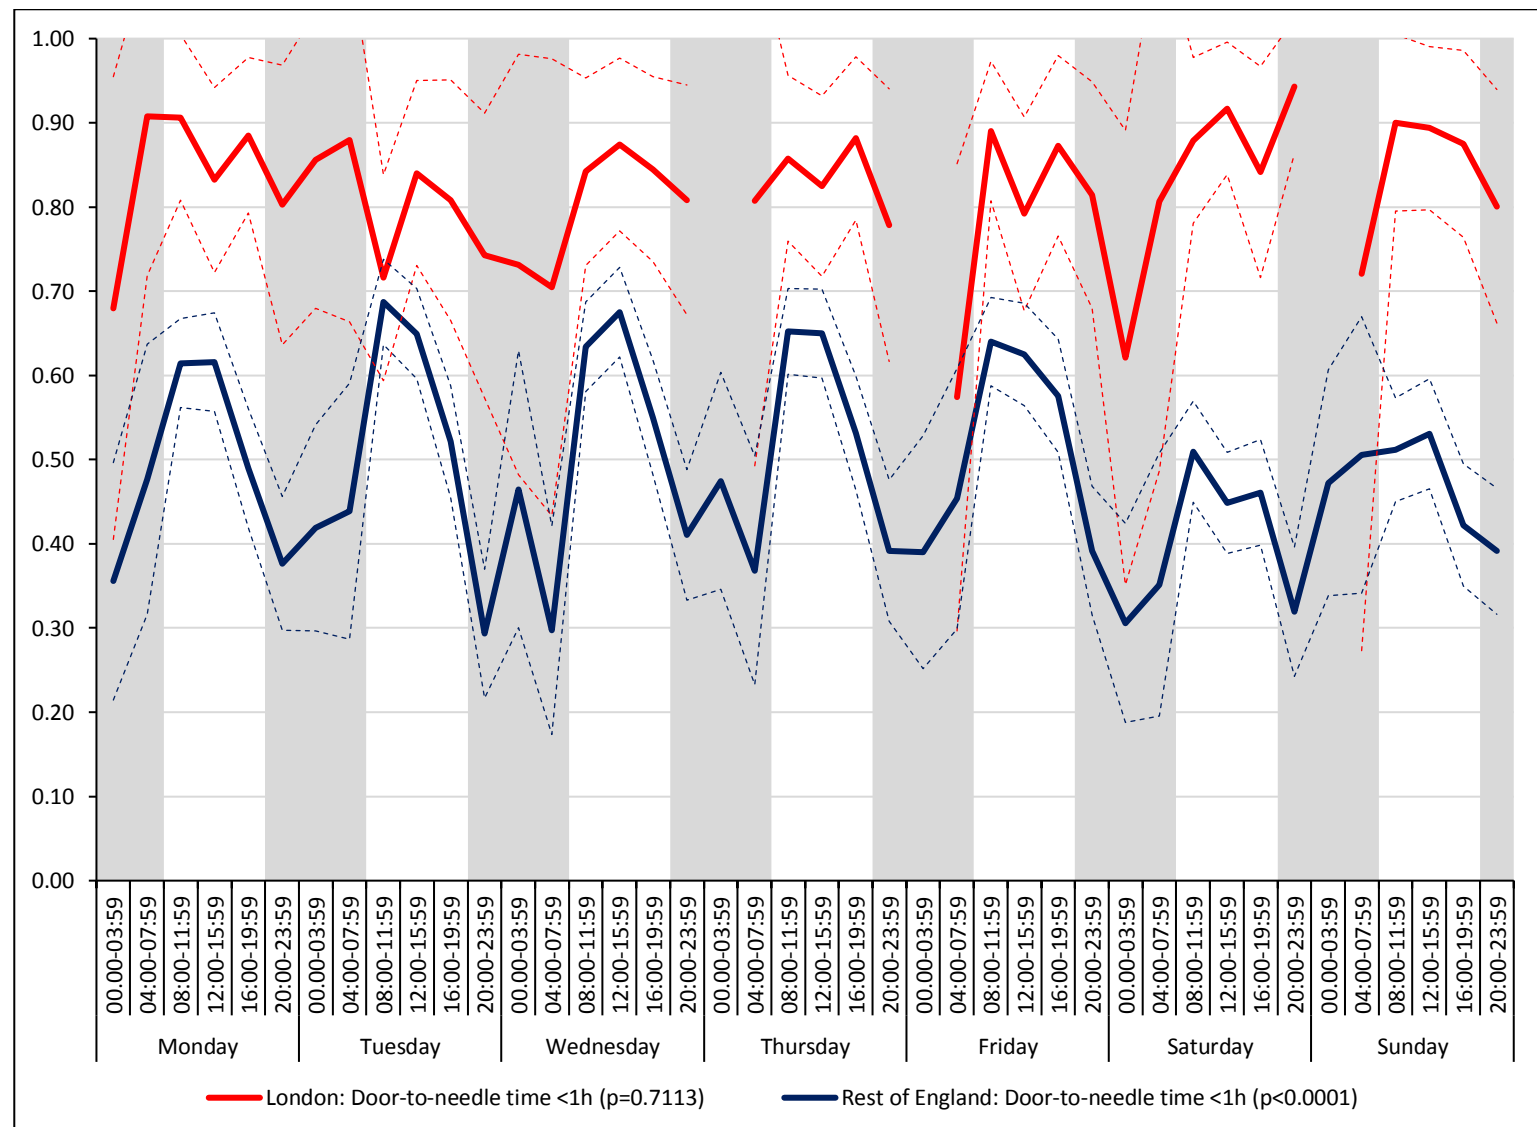

Figure S1(f). Door-to-needle time within one hour



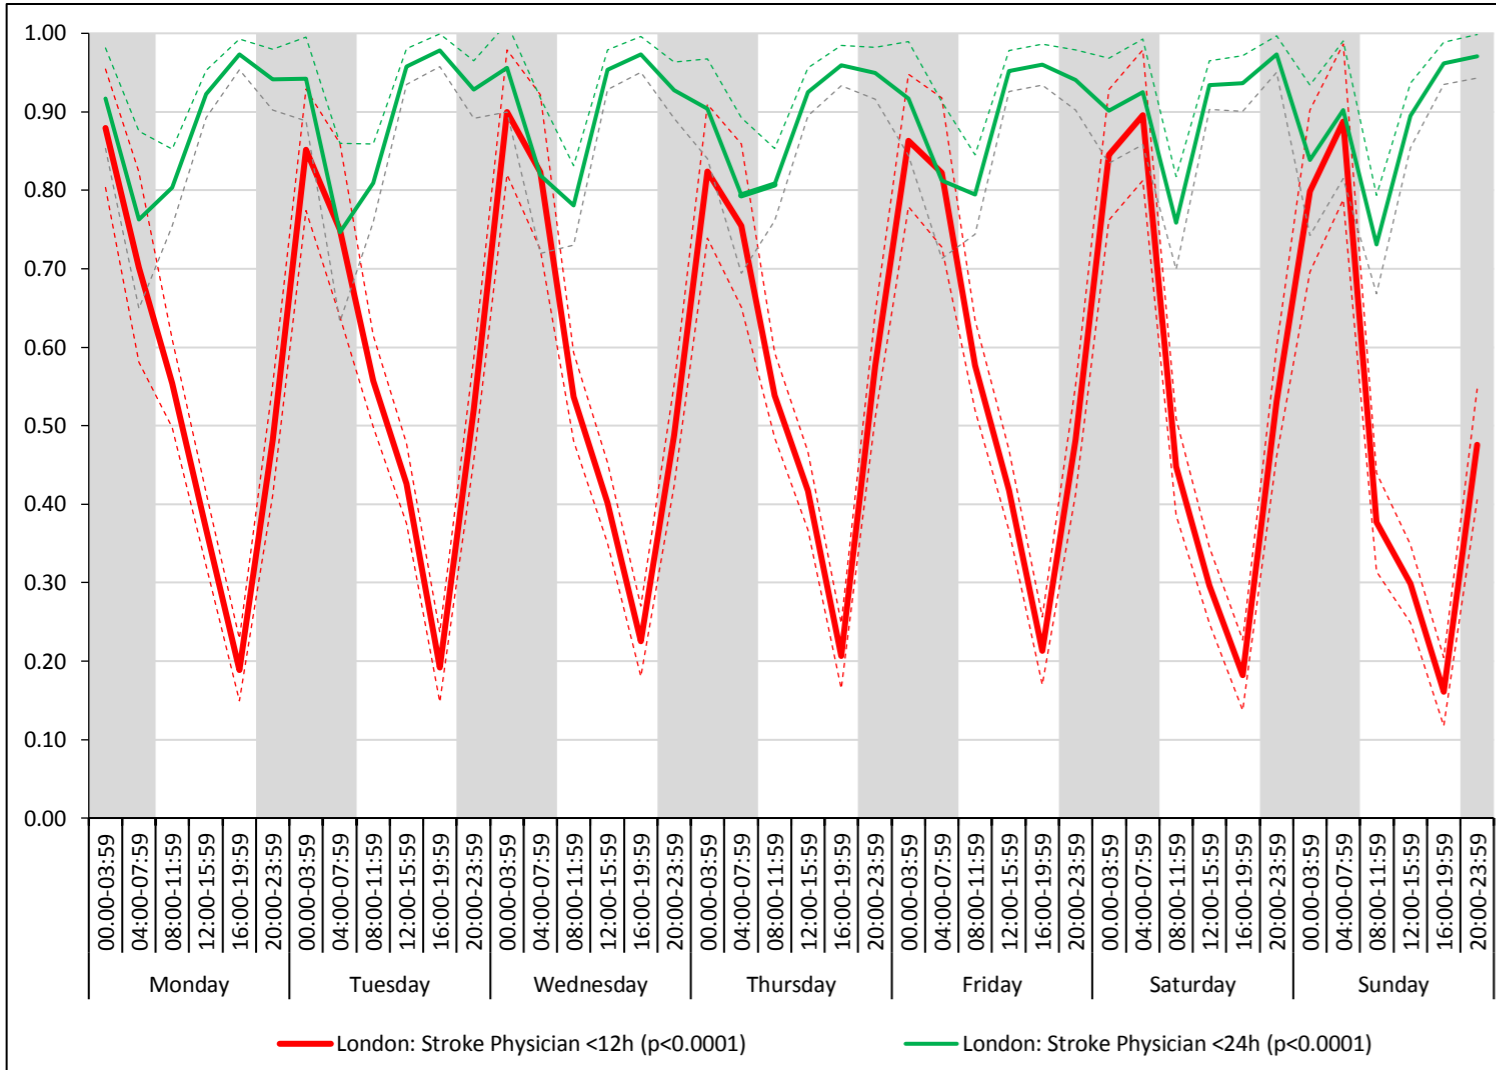

Figure S2(a). Assessment by a stroke consultant in London HASUs

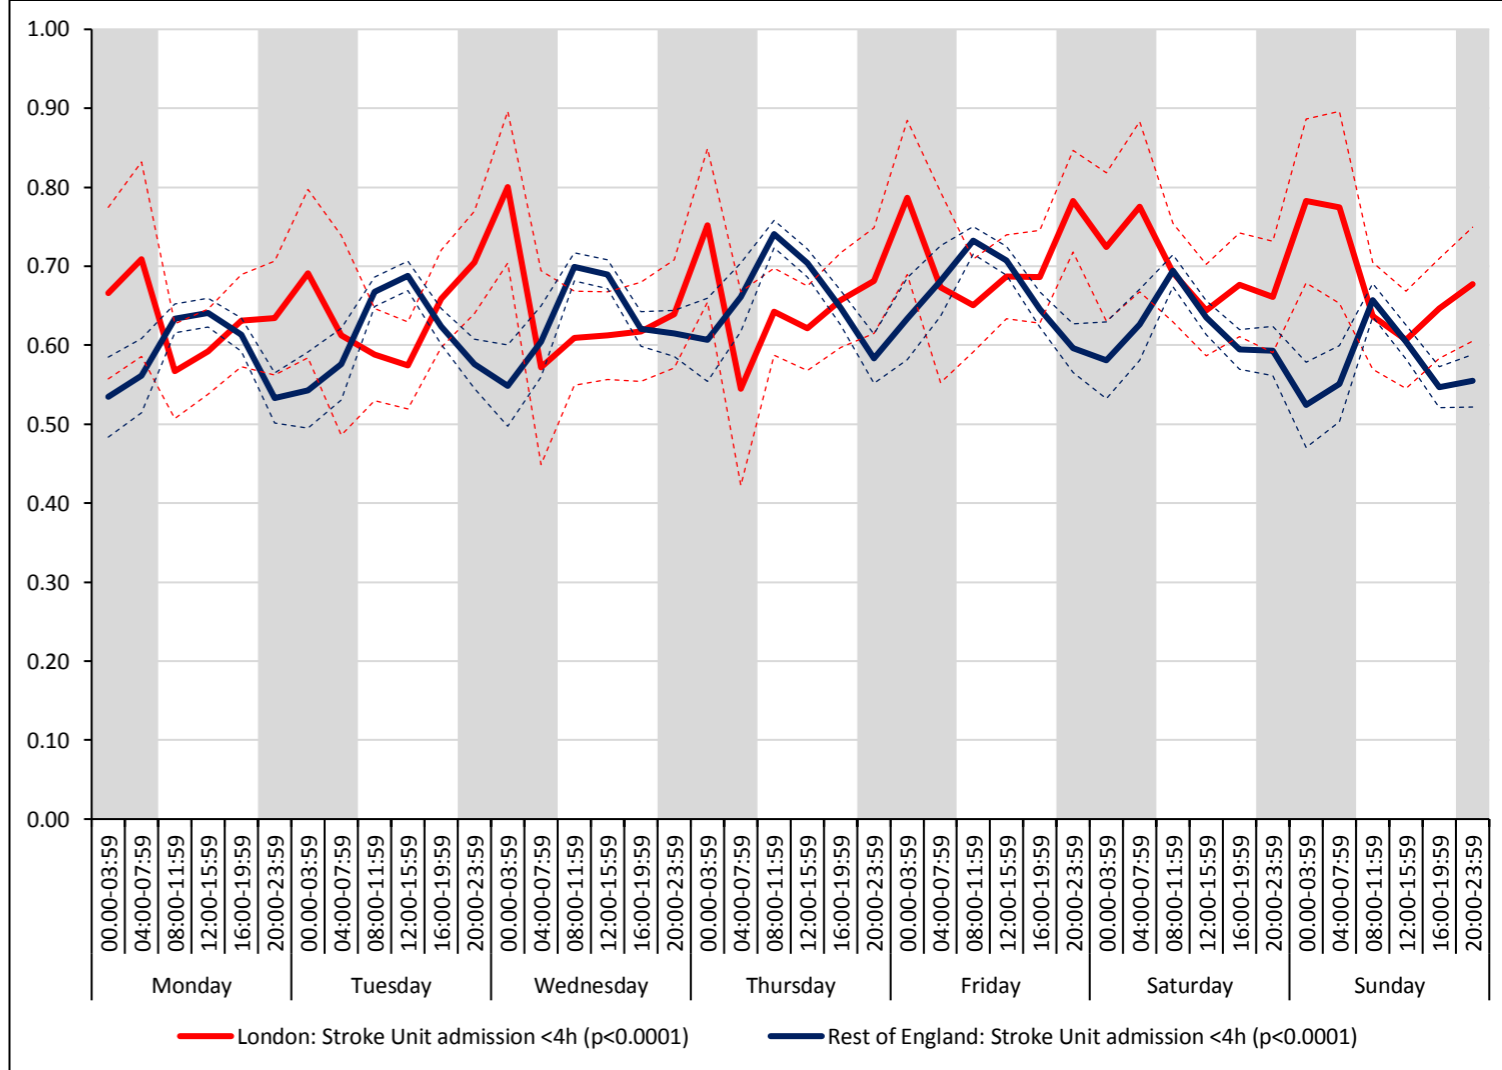

Figure S2(b). Admission to a stroke unit within four hours

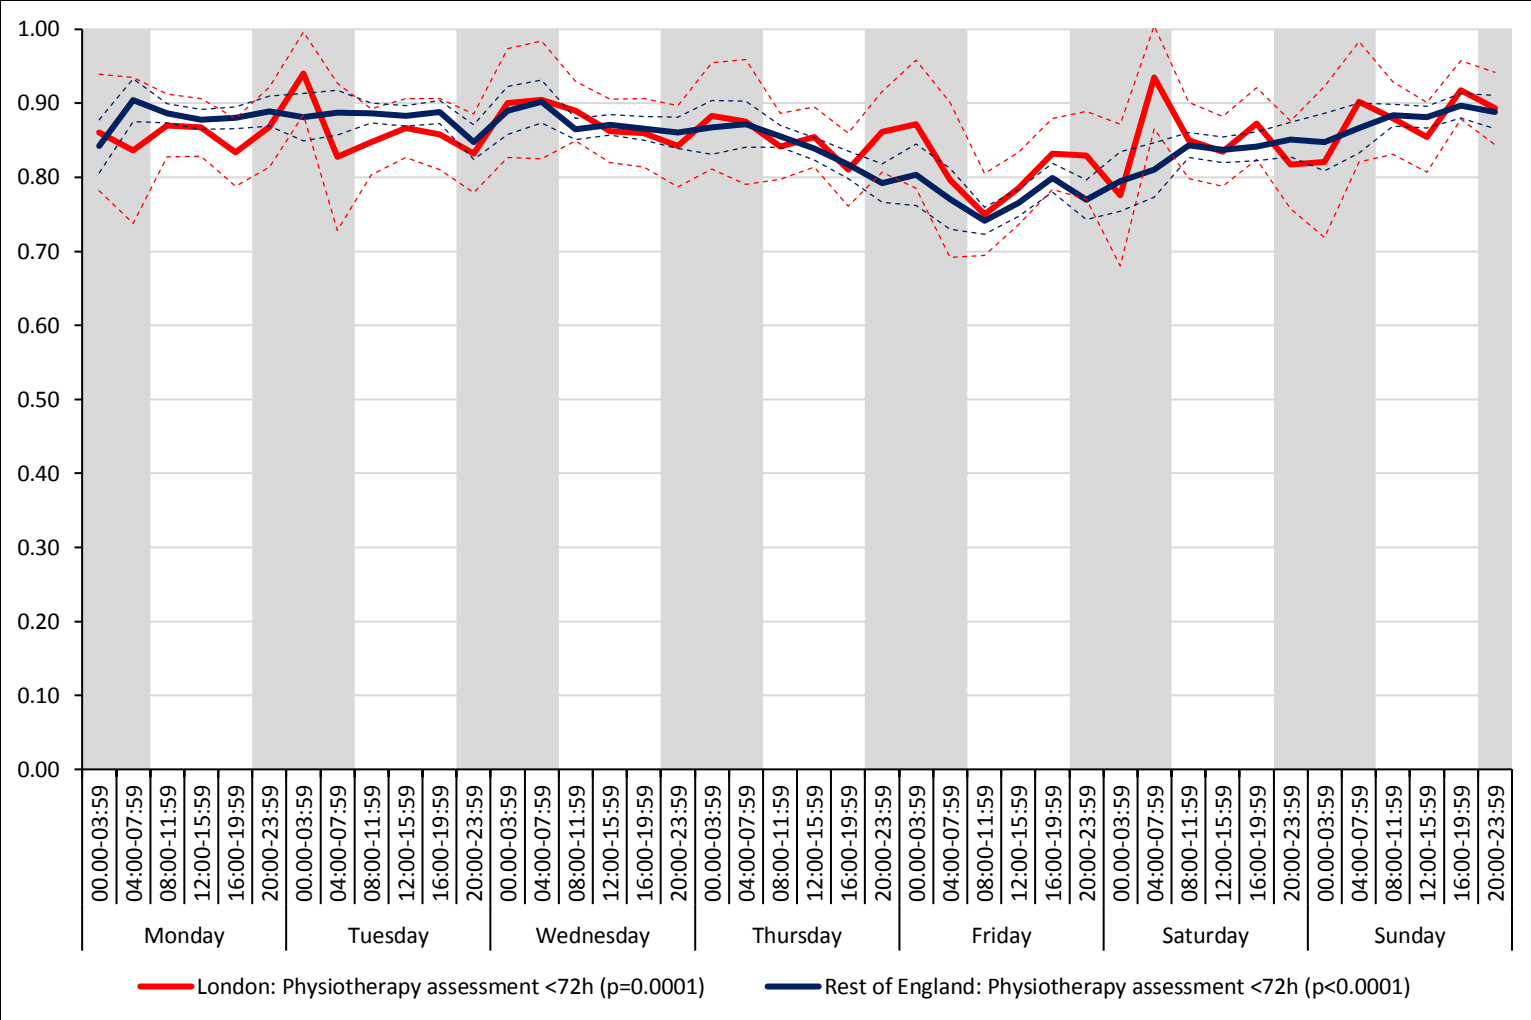

Figure S3(a). Physiotherapist assessment within 72 hours

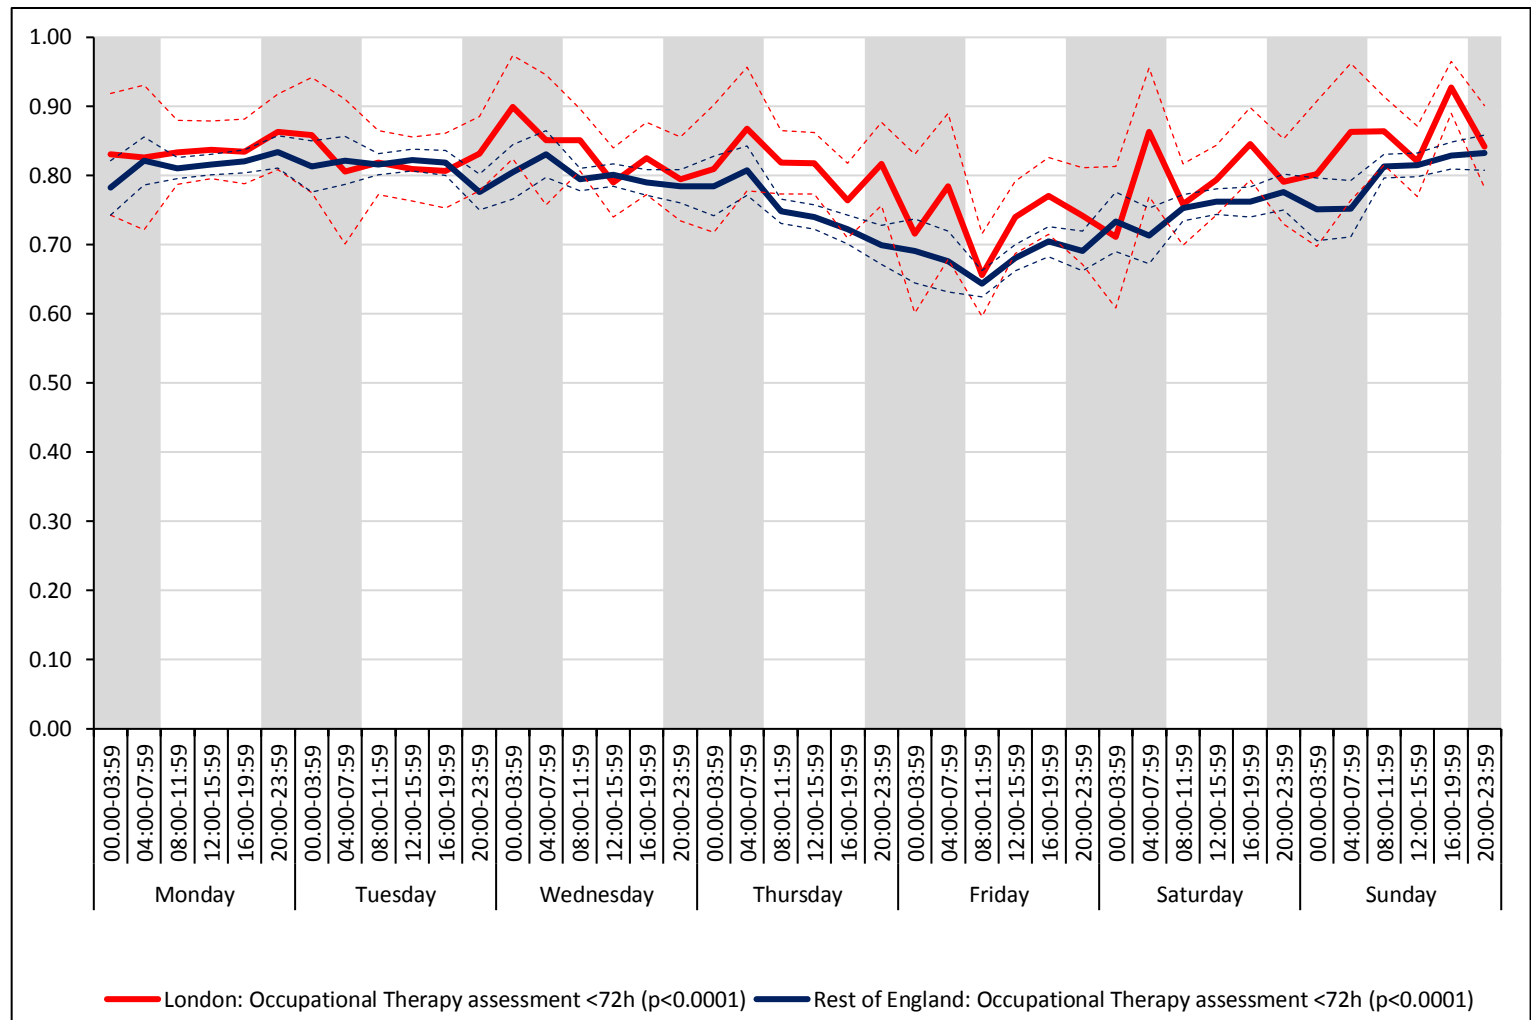

Figure S3(b). Occupational Therapist assessment within 72 hours

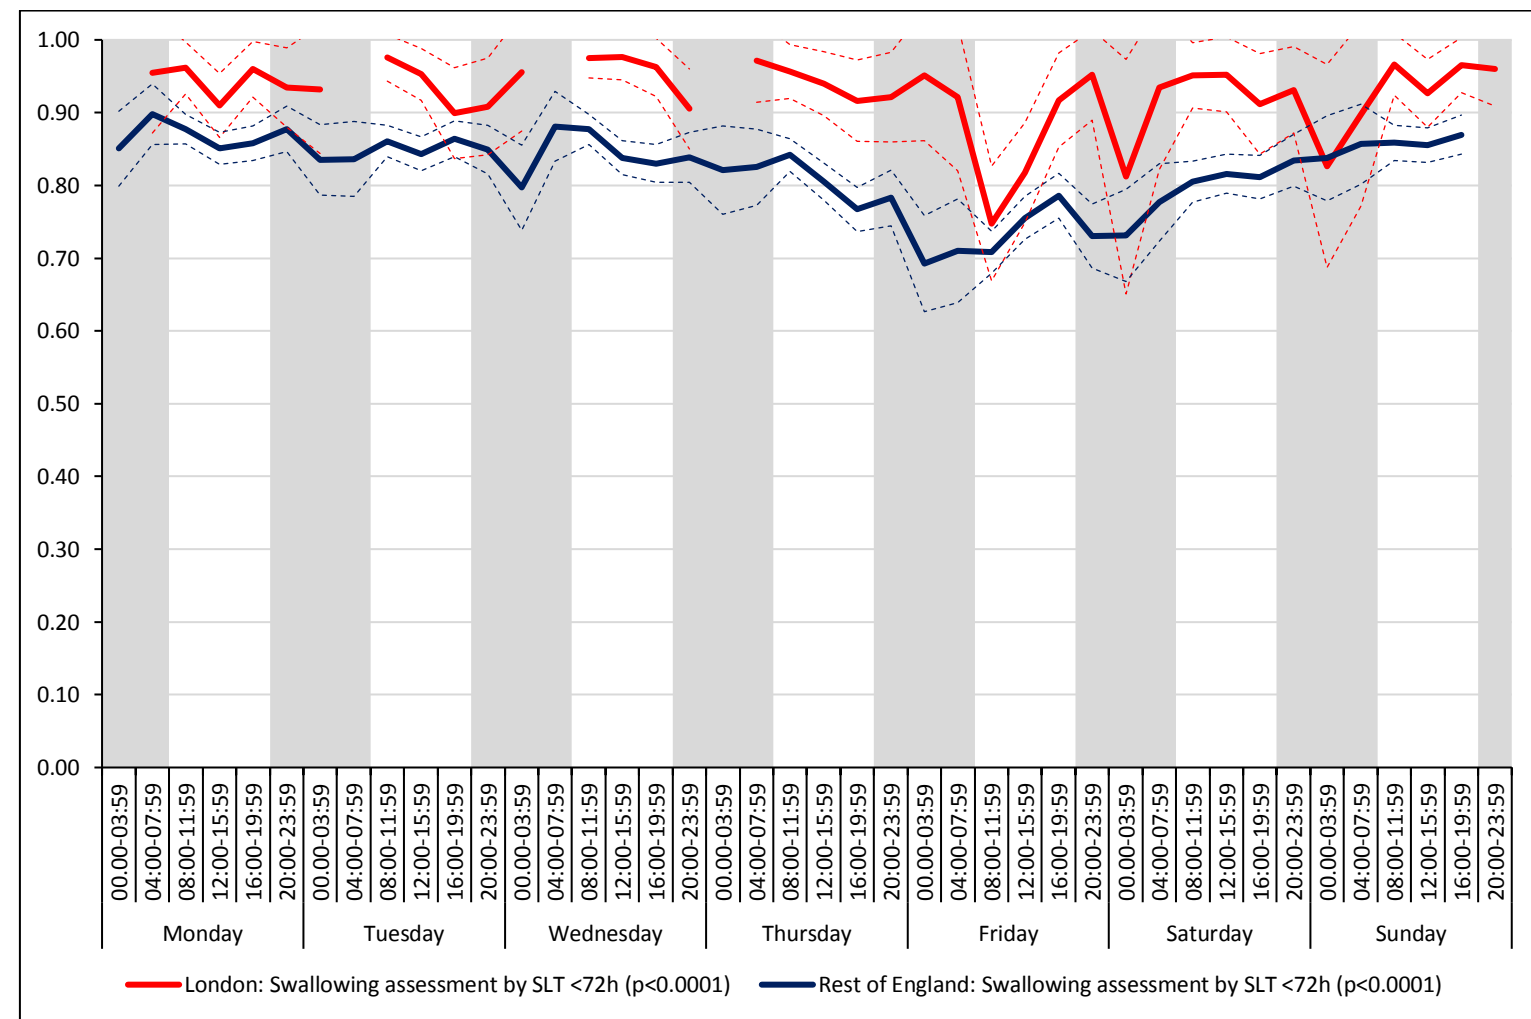

Figure S3(c). Swallow assessment by a SaLT within 72 hours

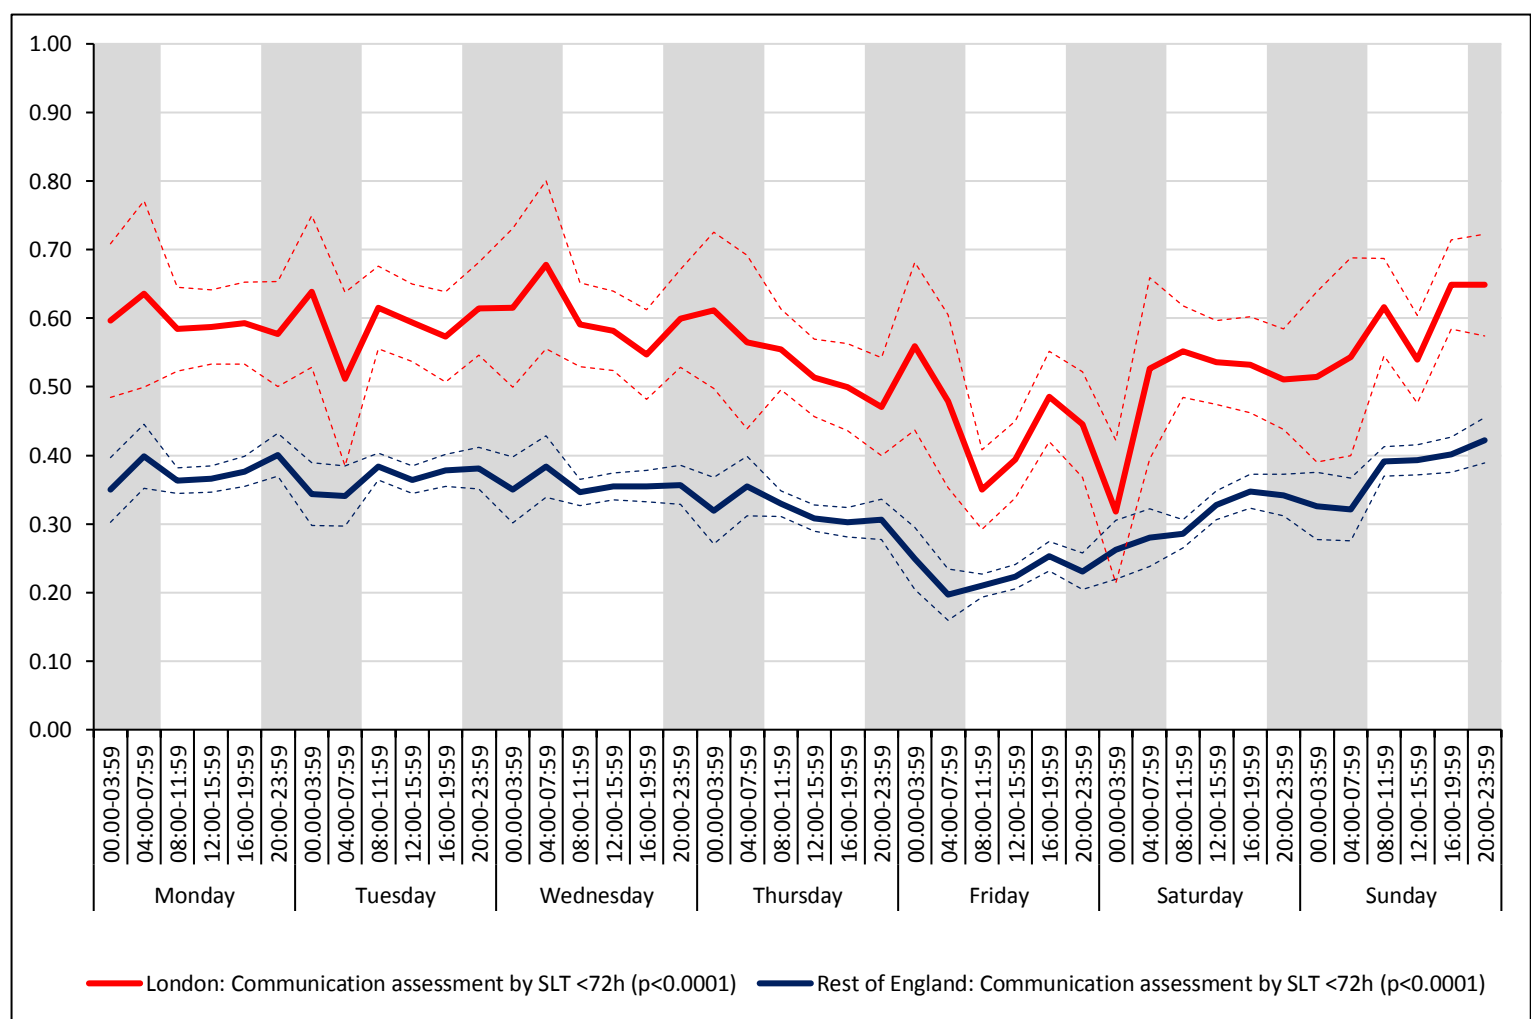

Figure S3(d). Communication assessment by a SaLT within 72 hours

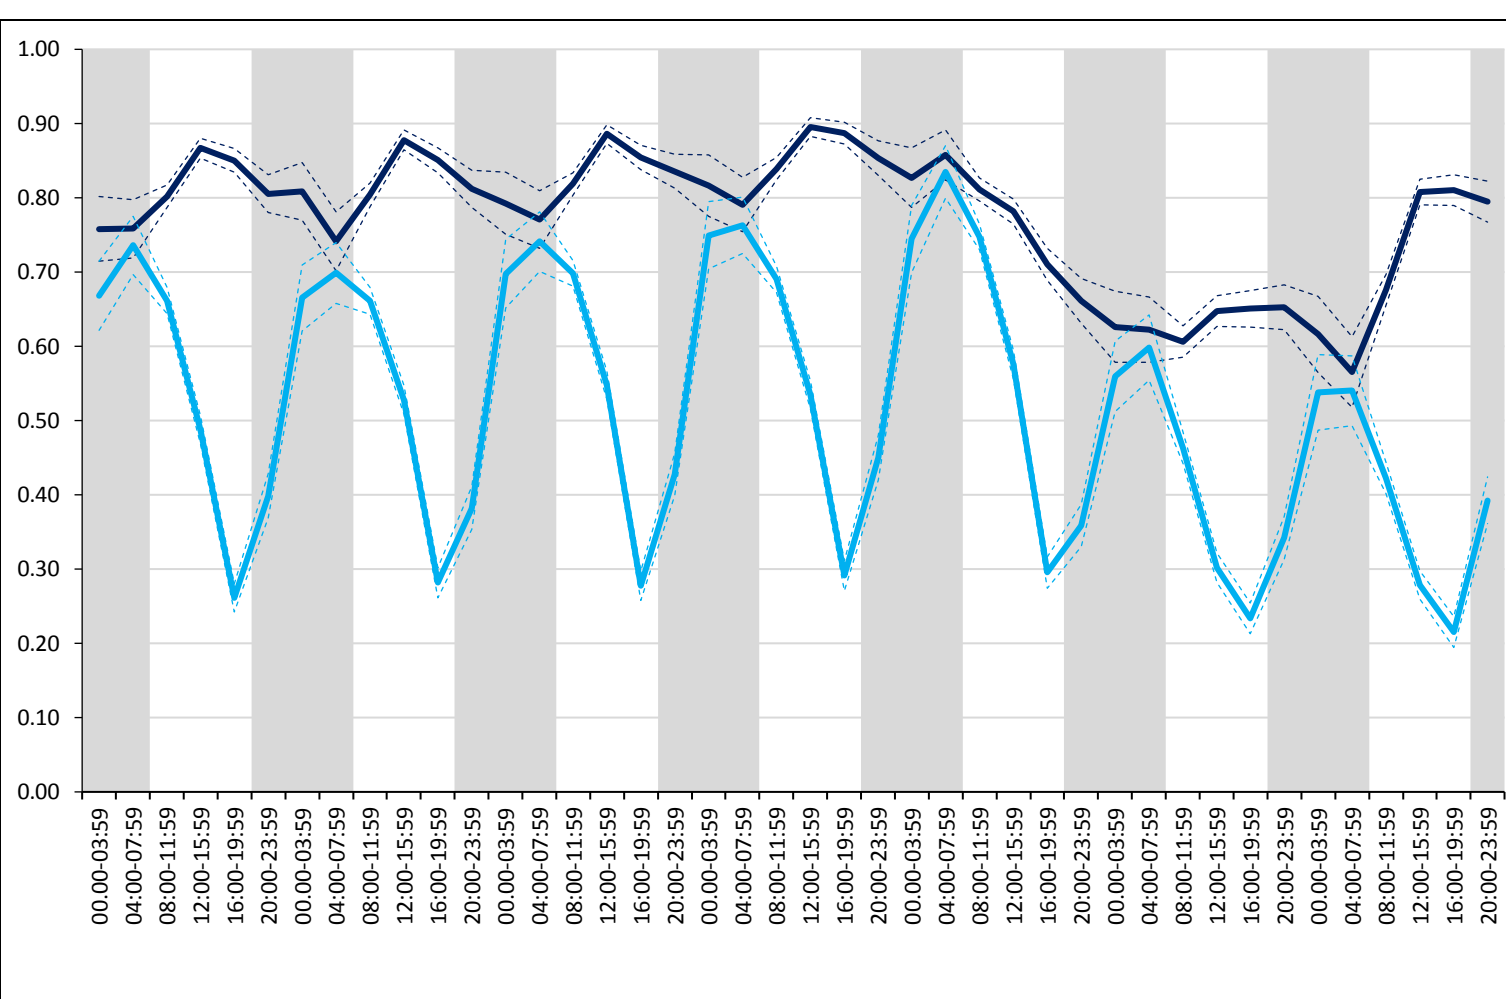

Figure S4(a). Assessment by a stroke consultant in Rest of England

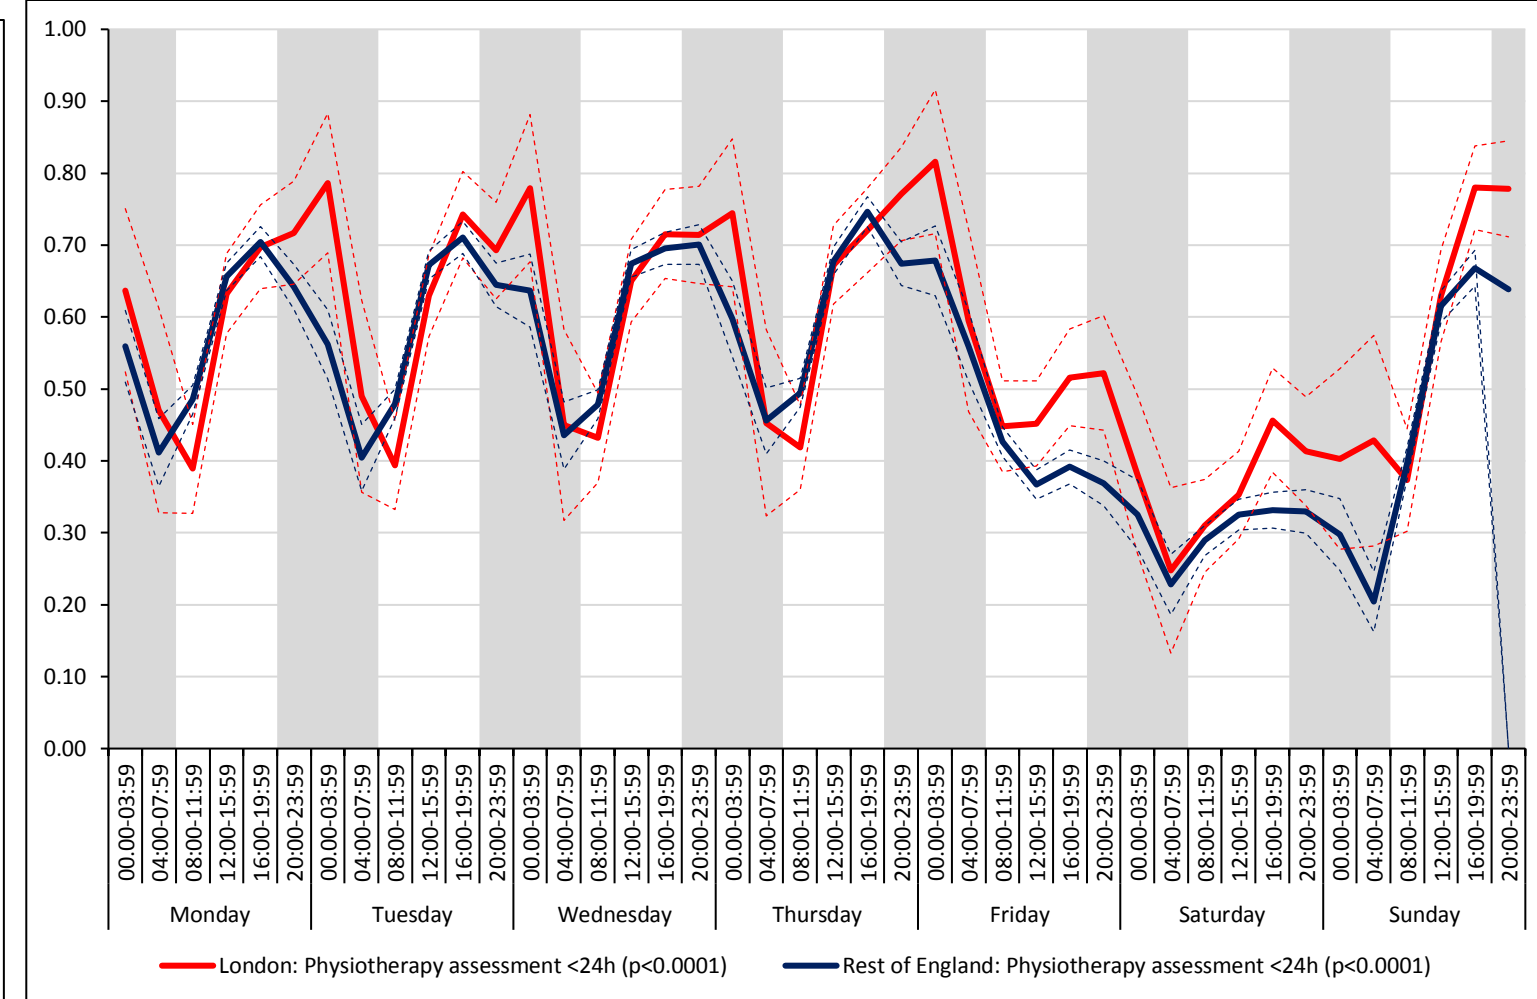

Figure S4(b). Physiotherapist assessment within 24 hours

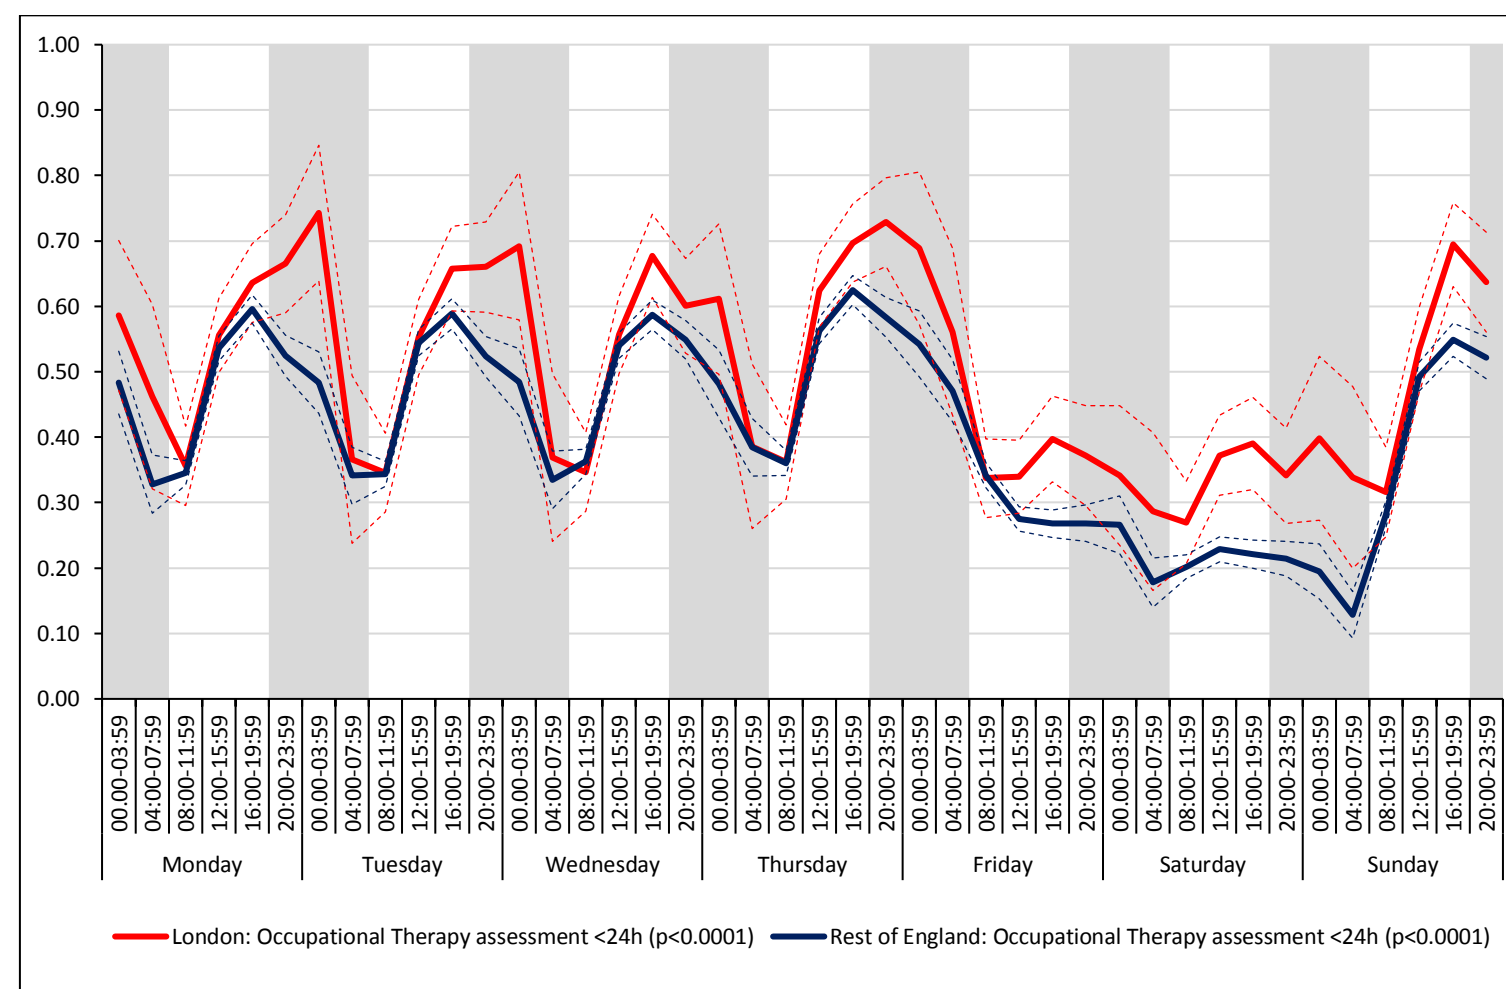

Figure S4(c). Occupational Therapist assessment within 24 hours

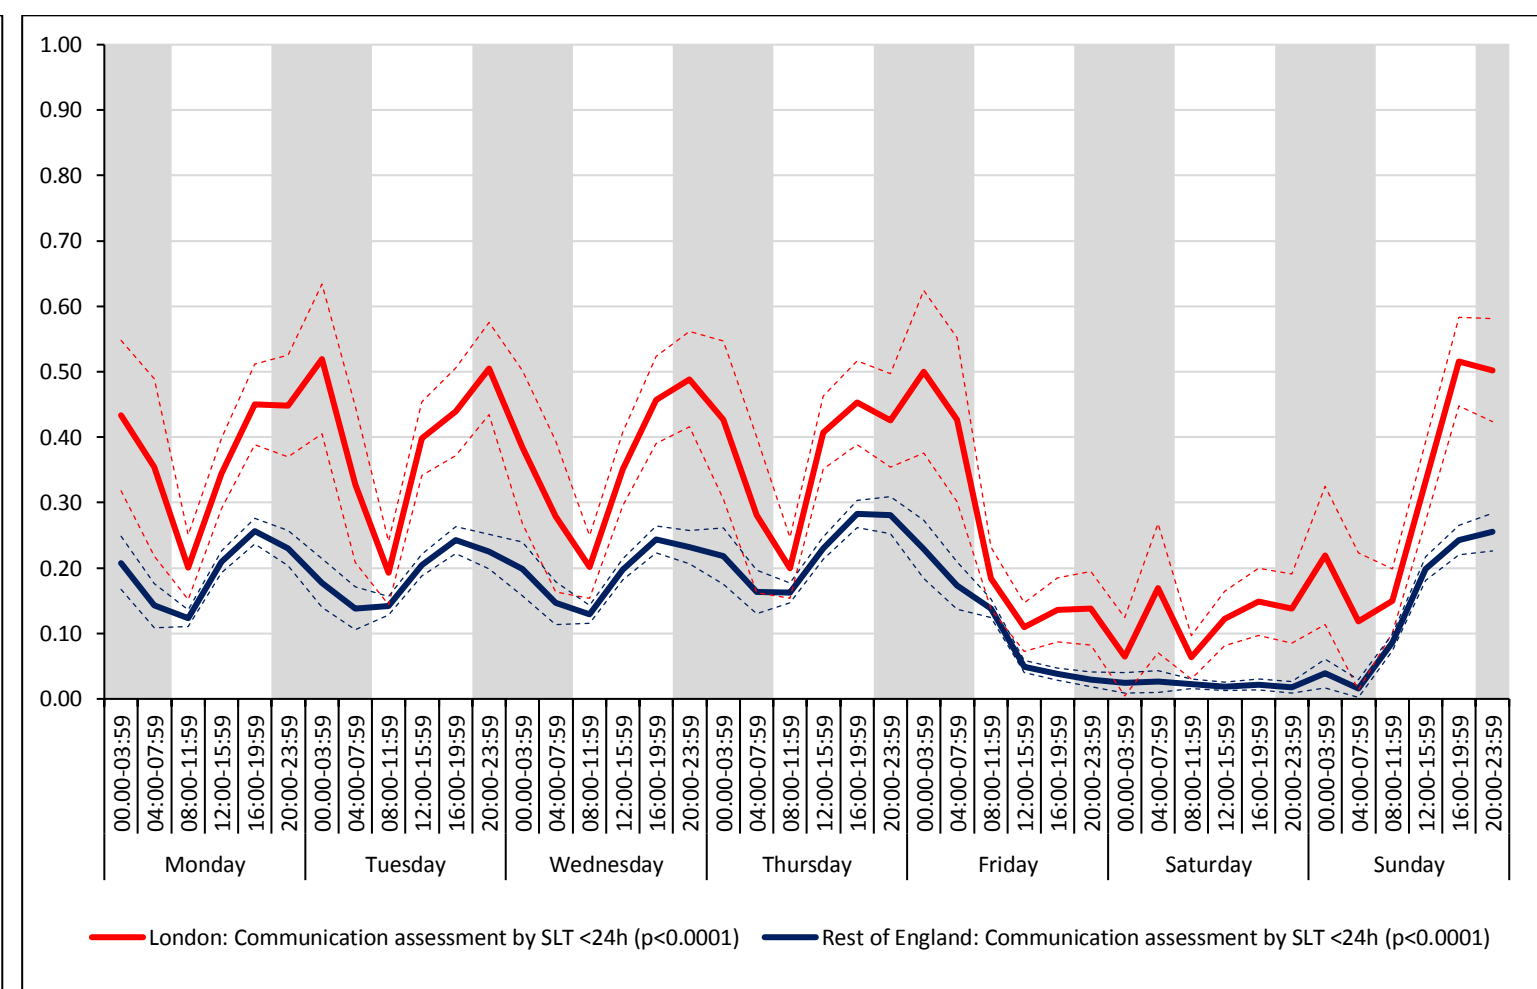

Figure S4(d). Communication assessment by a SaLT within 24 hours

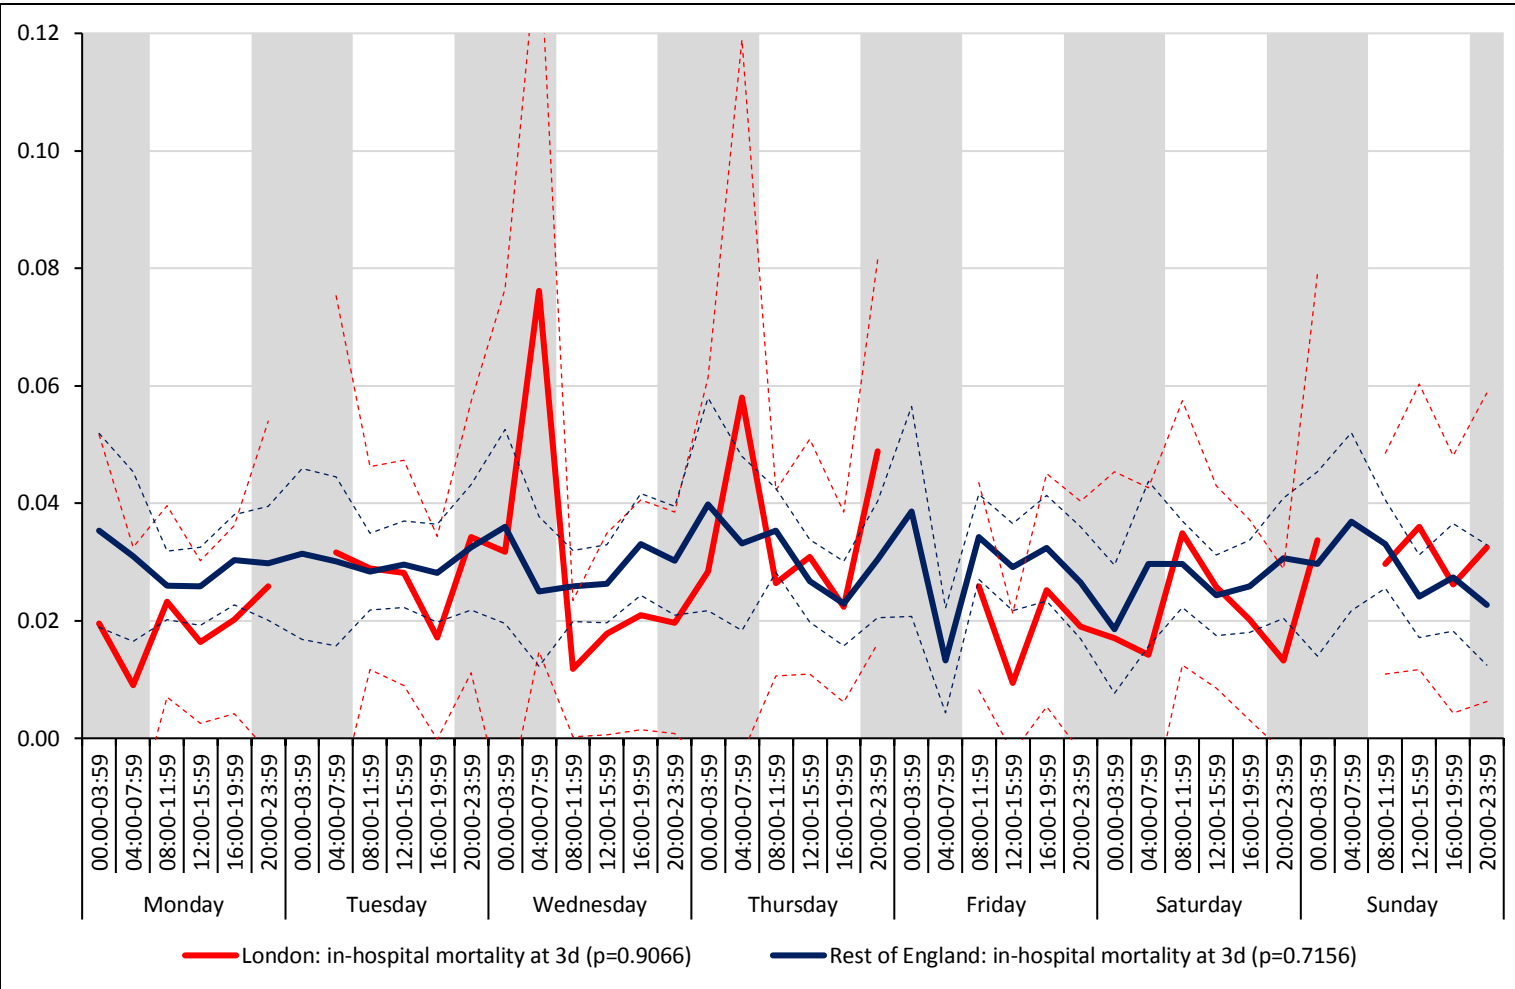

Figure S5(a). Mortality at three days

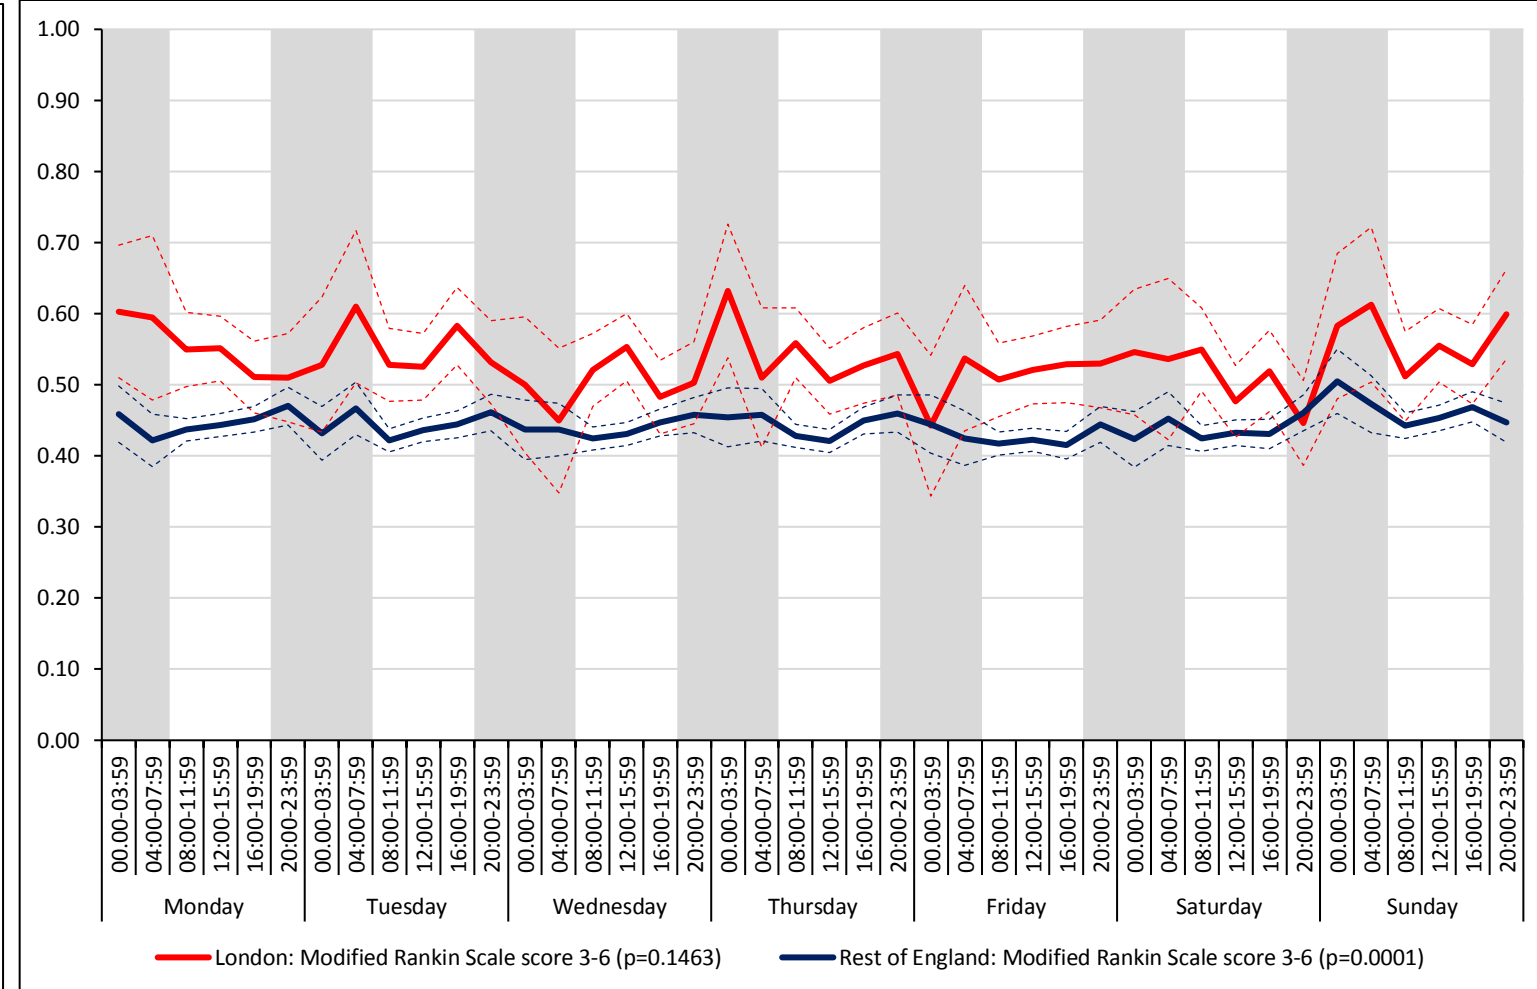

Figure S5(b). Modified Rankin Scale score 3-6

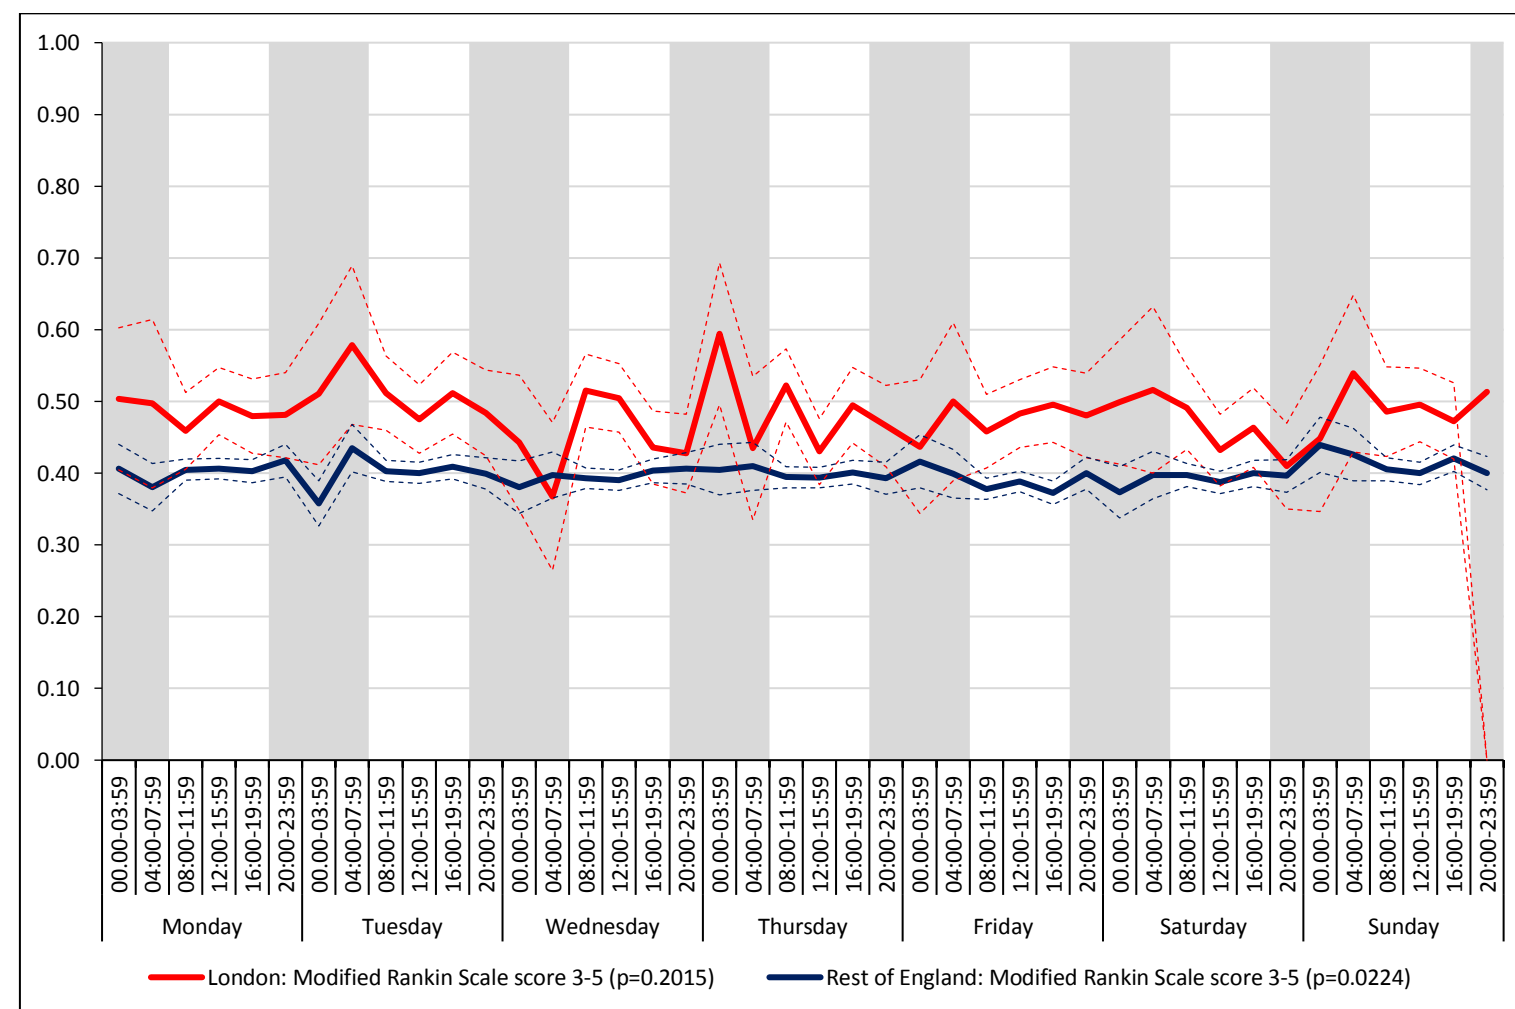

Figure S5(c). Modified Rankin Scale score 3-5

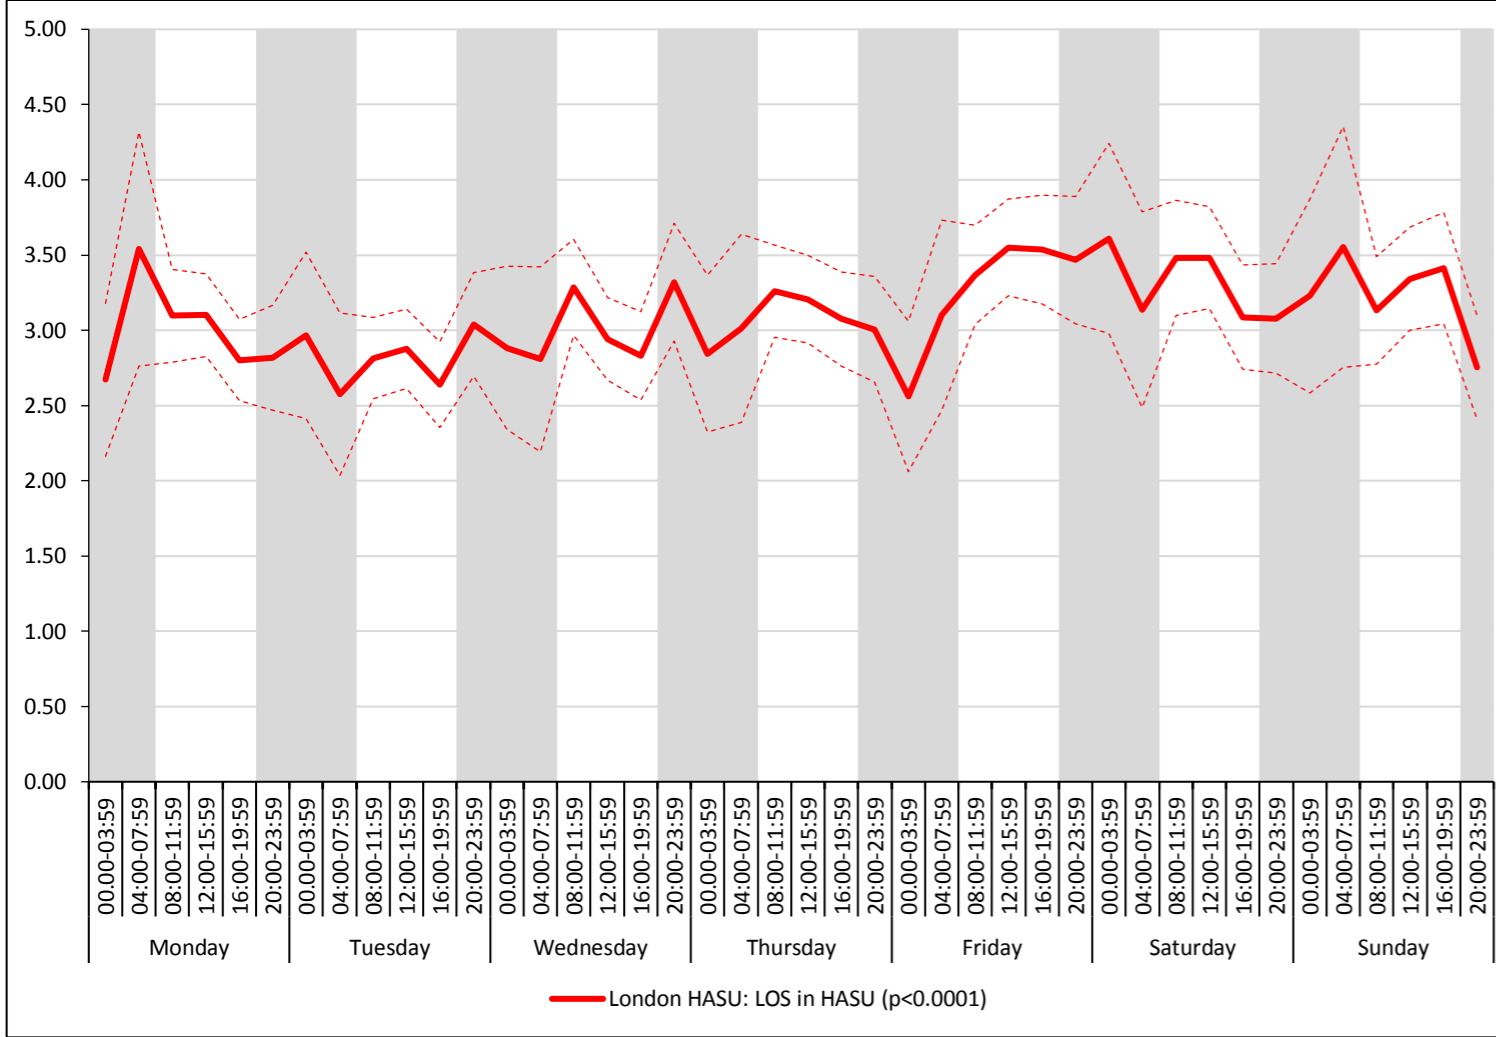

Figure S6(a). Length of stay in HASU

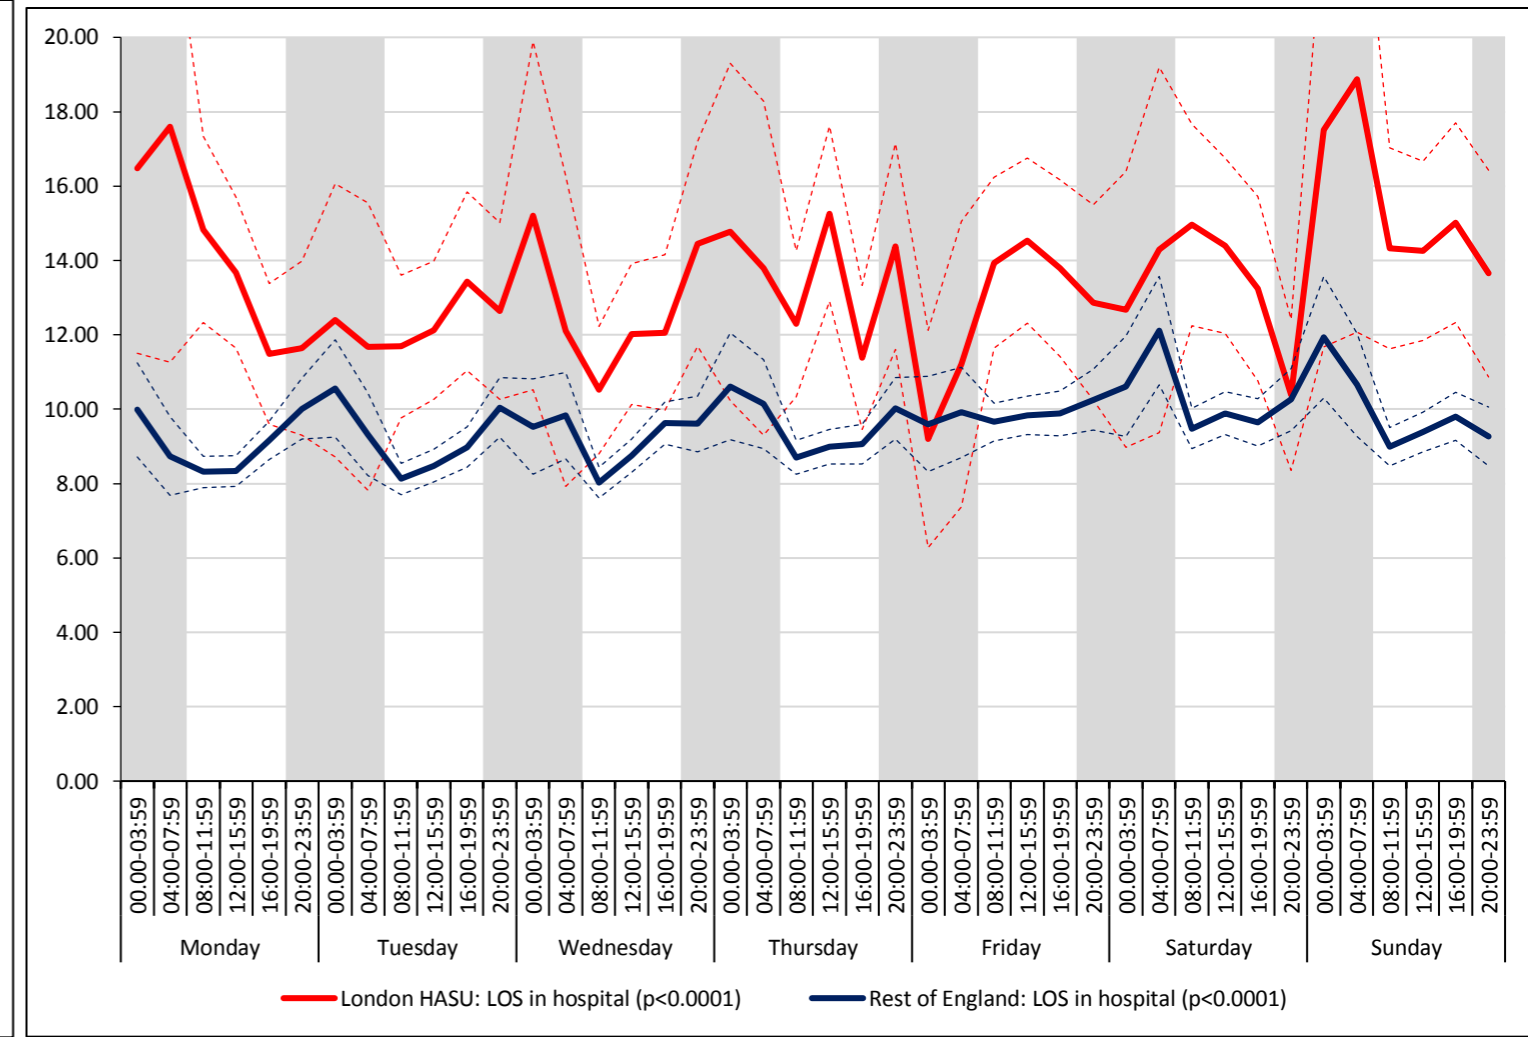

Figure S6(b). Length of stay in hospital
